# Supplementary material for: Bacterial intra-species gene loss occurs in a largely clocklike manner mostly within a pool of less conserved and constrained genes
Source: PubMed Central journal article supplement (PMC5062063; doi:10.1038/srep35168), 2016-10-13
Supplement: srep35168-s1.pdf [file srep35168-s1.pdf]

**Bacterial intra-species gene loss occurs in a largely clocklike manner mostly within a pool of less conserved and constrained genes**

**Authors:** Evgeni Bolotin and Ruth Hershberg

***B. cereus***

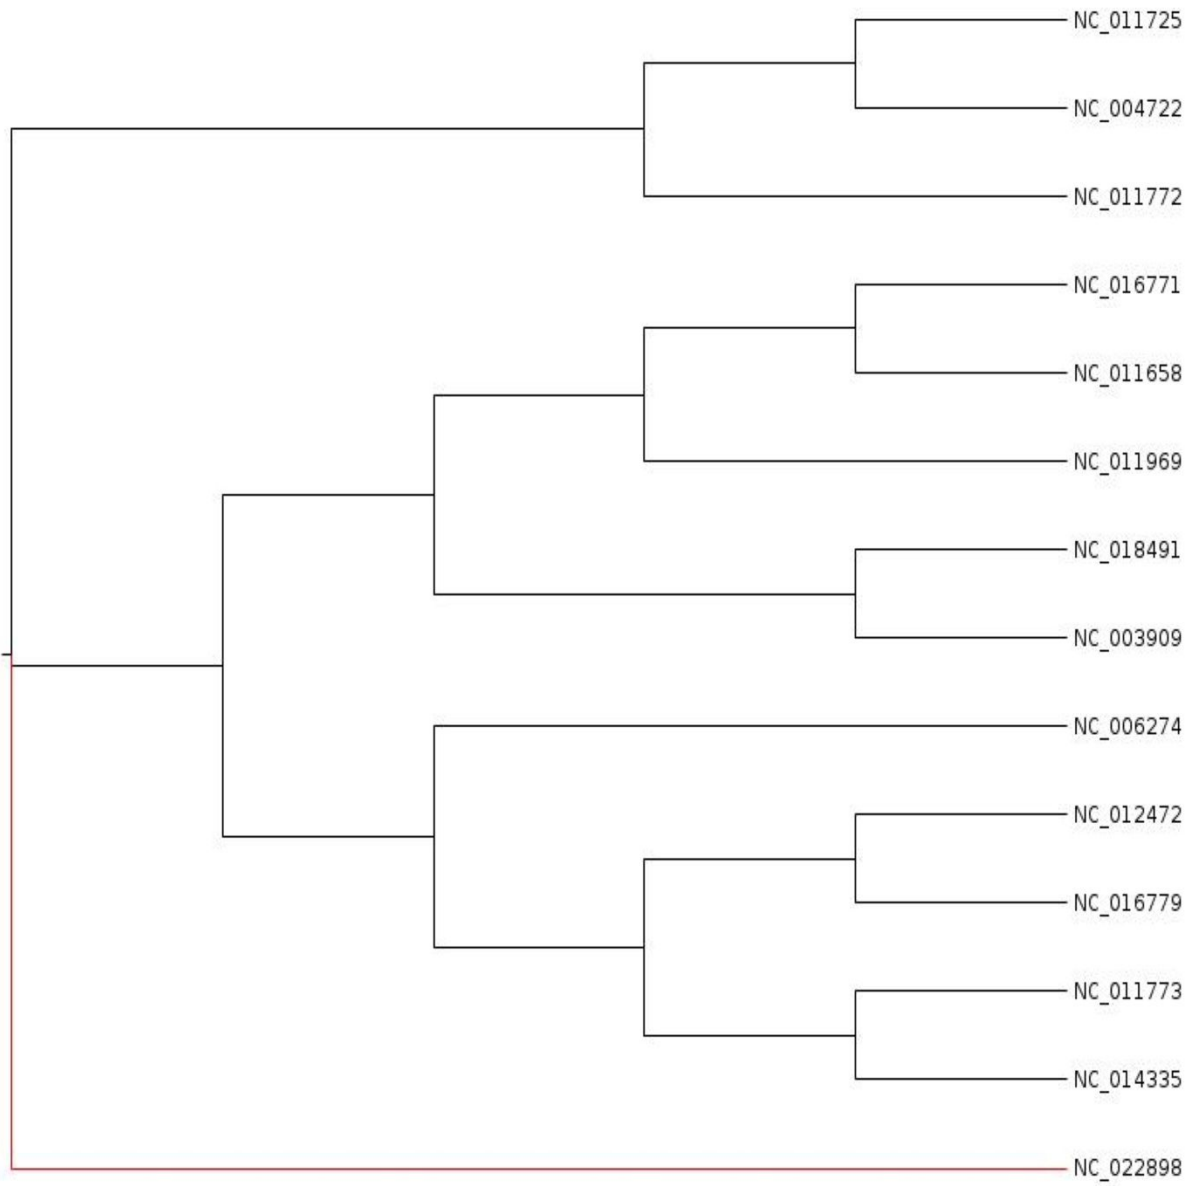

***C. botulinum***

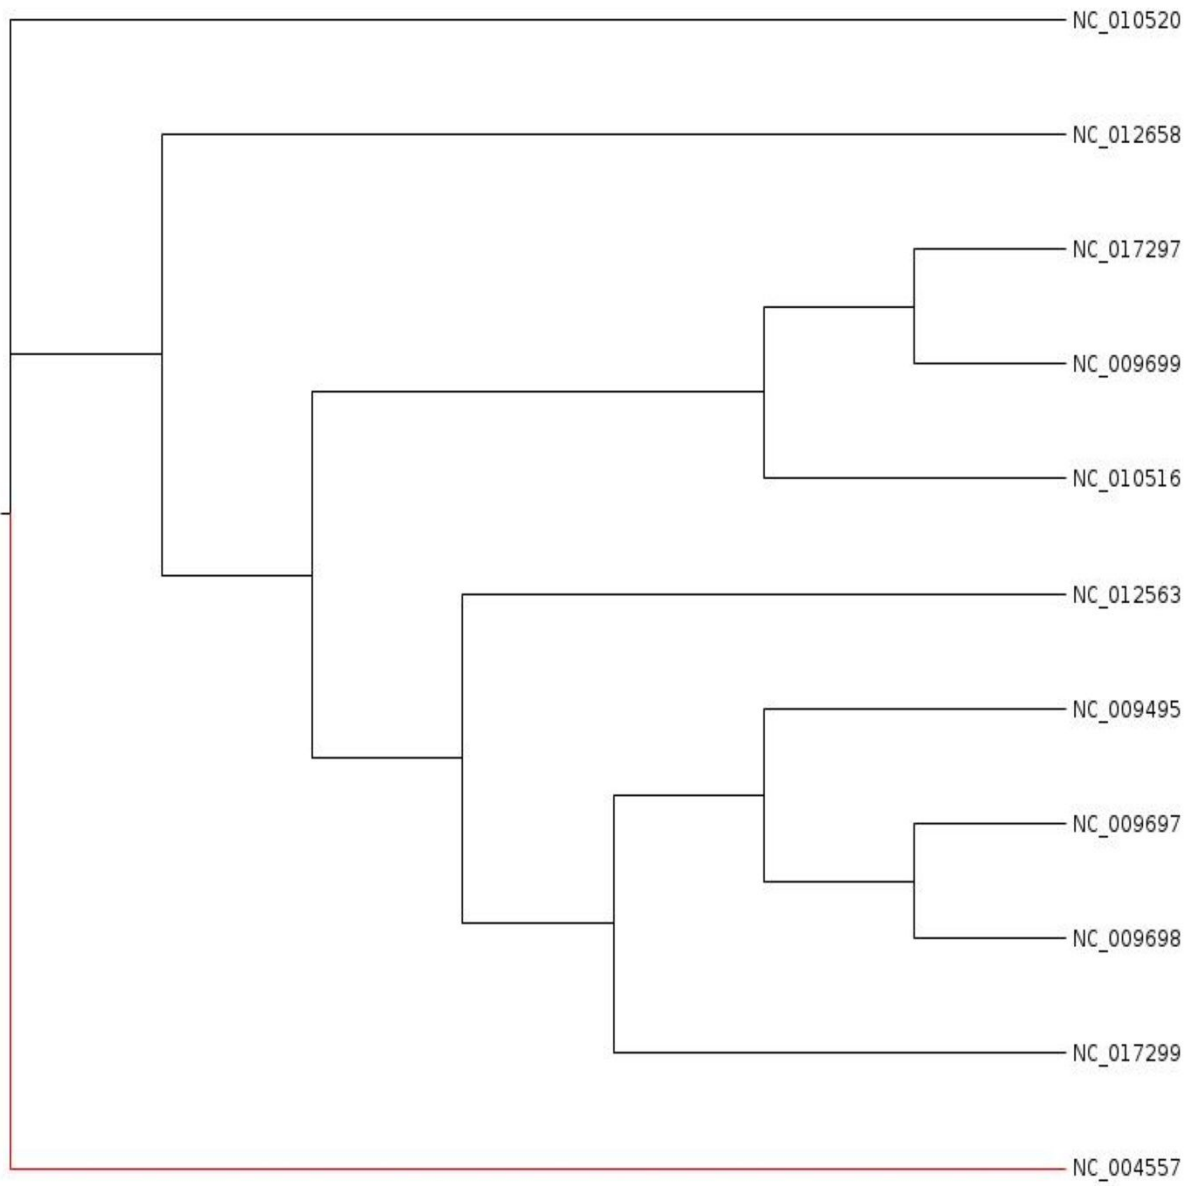

***C. diphtheriae***

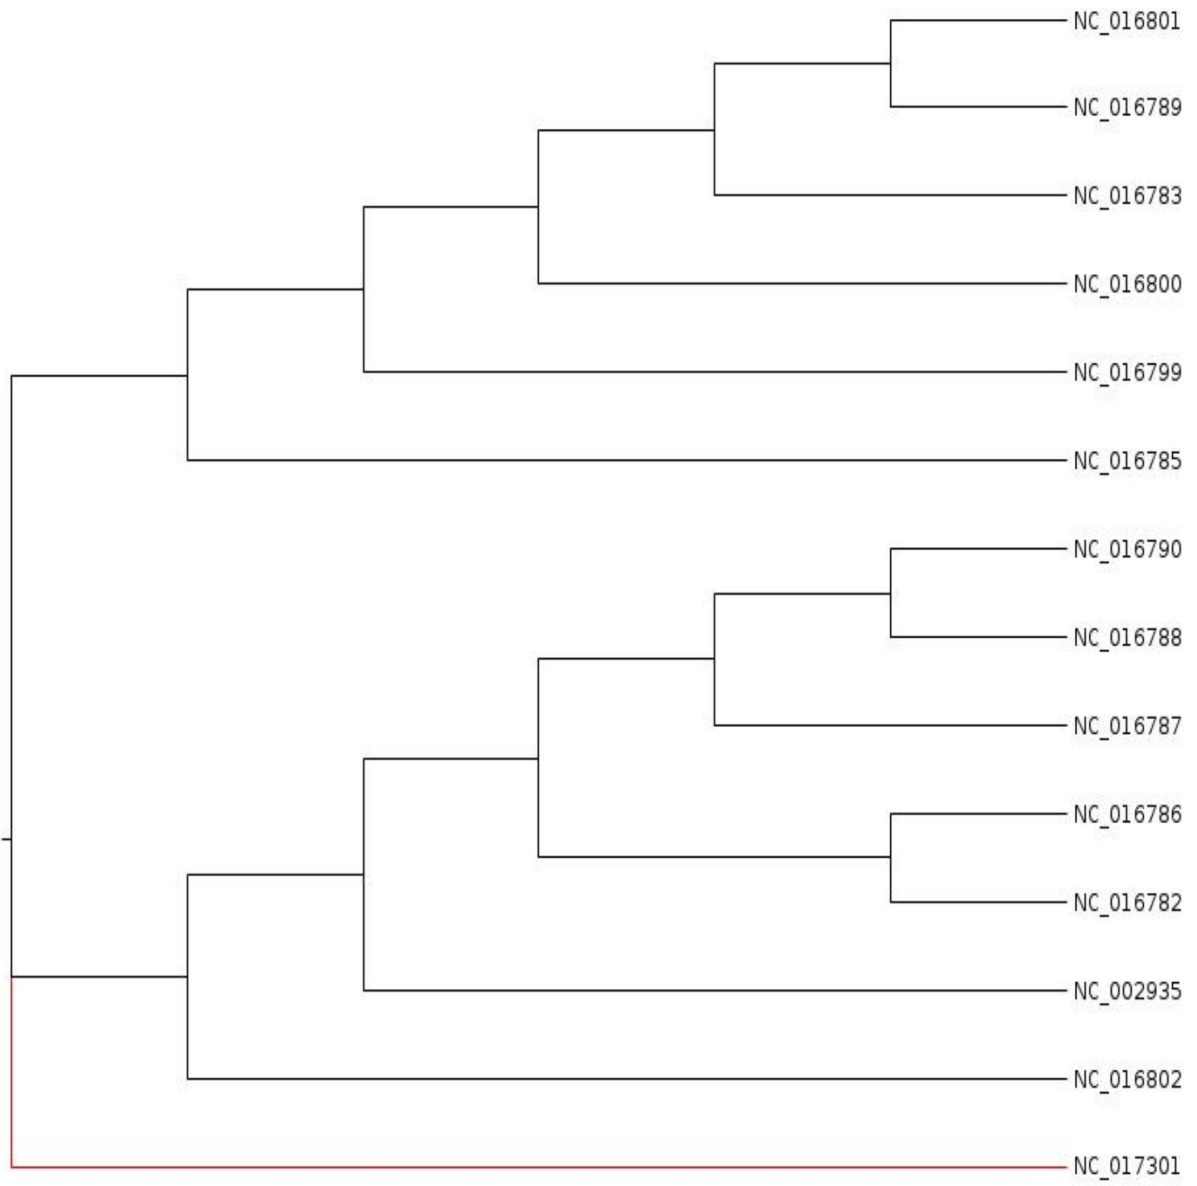

***C. jejuni***

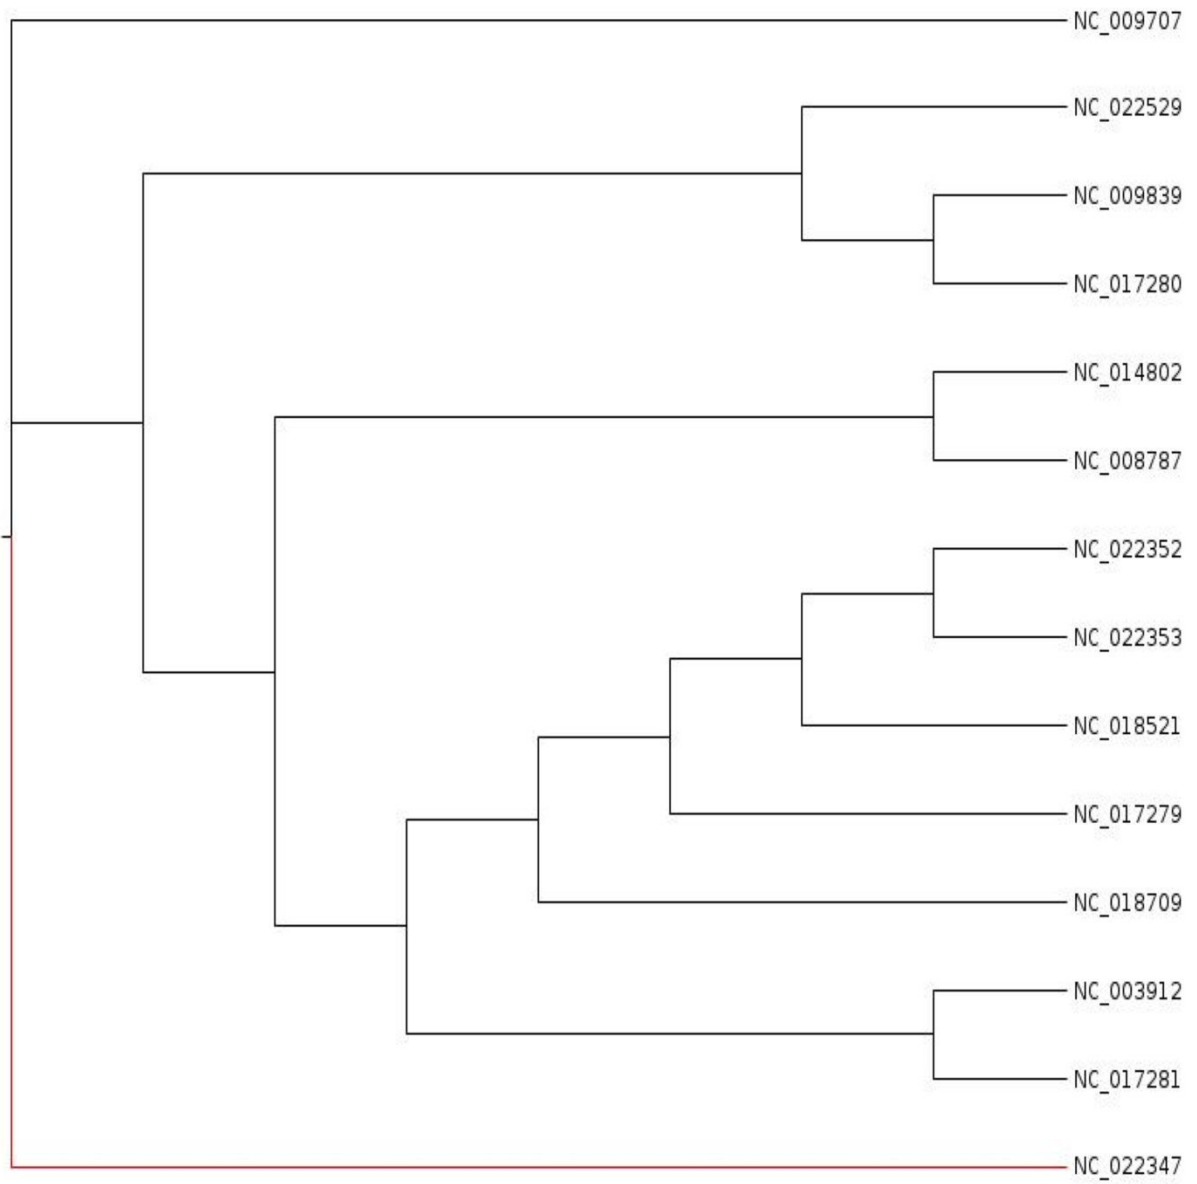

***C. pseudotuberculosis***

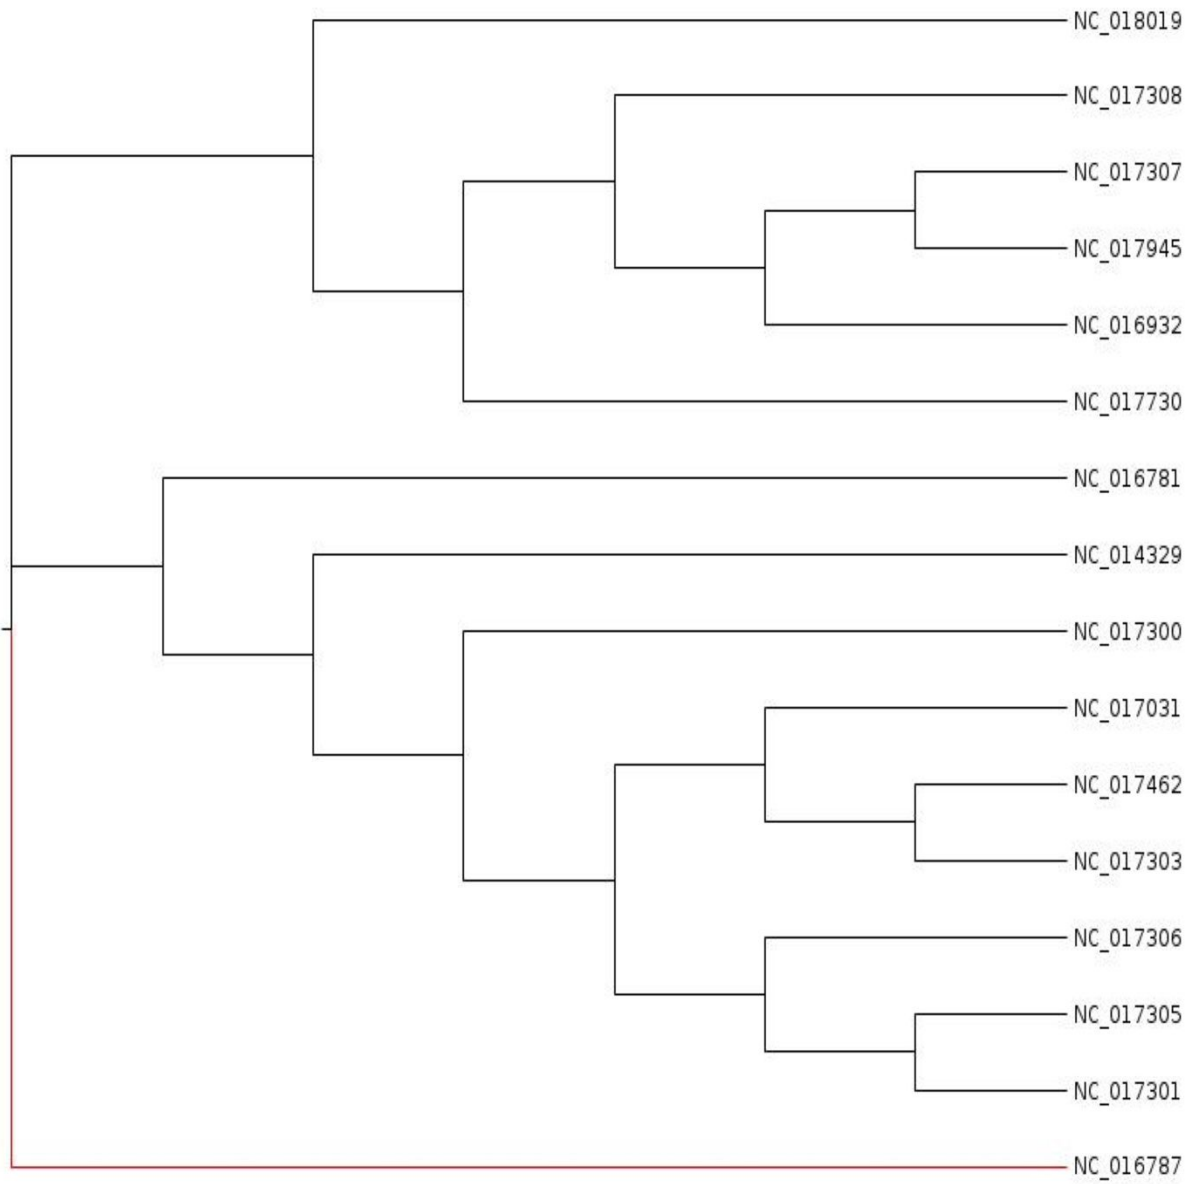

## *E. coli* - *Shigella*

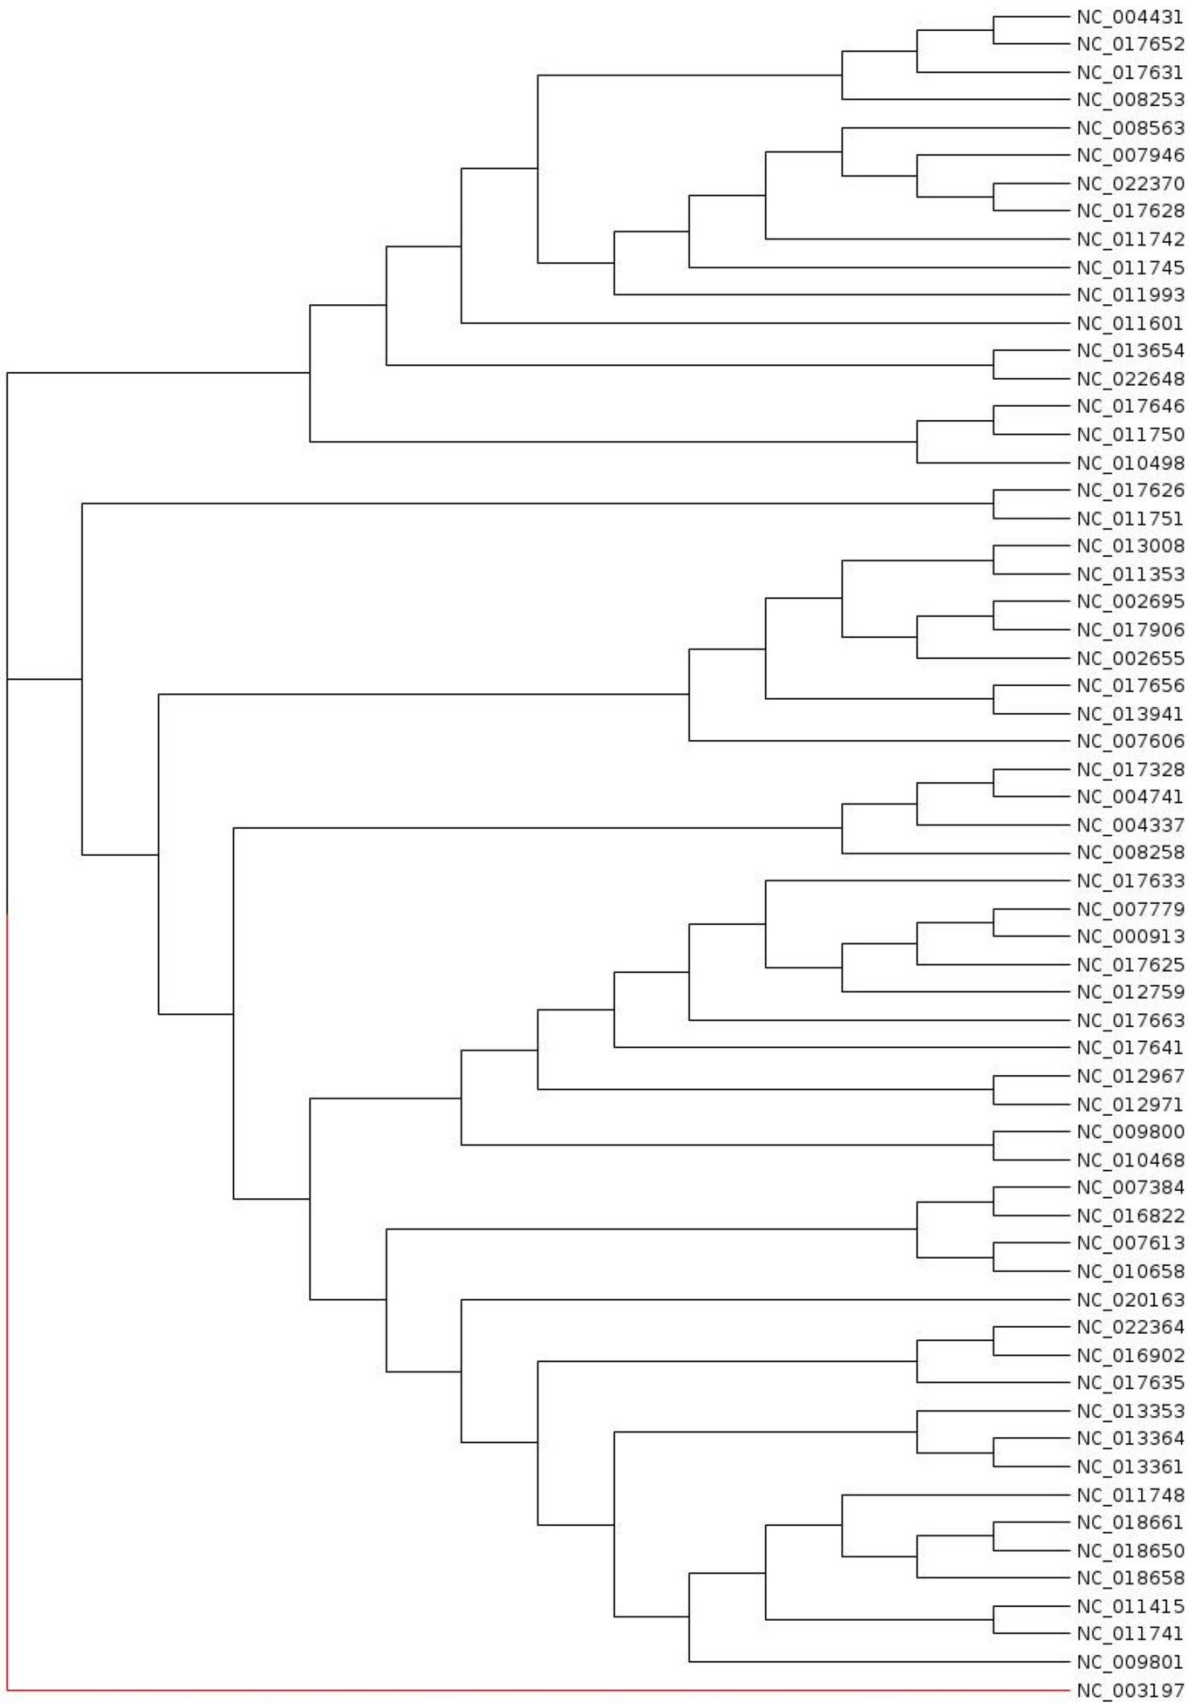

***F. tularensis***

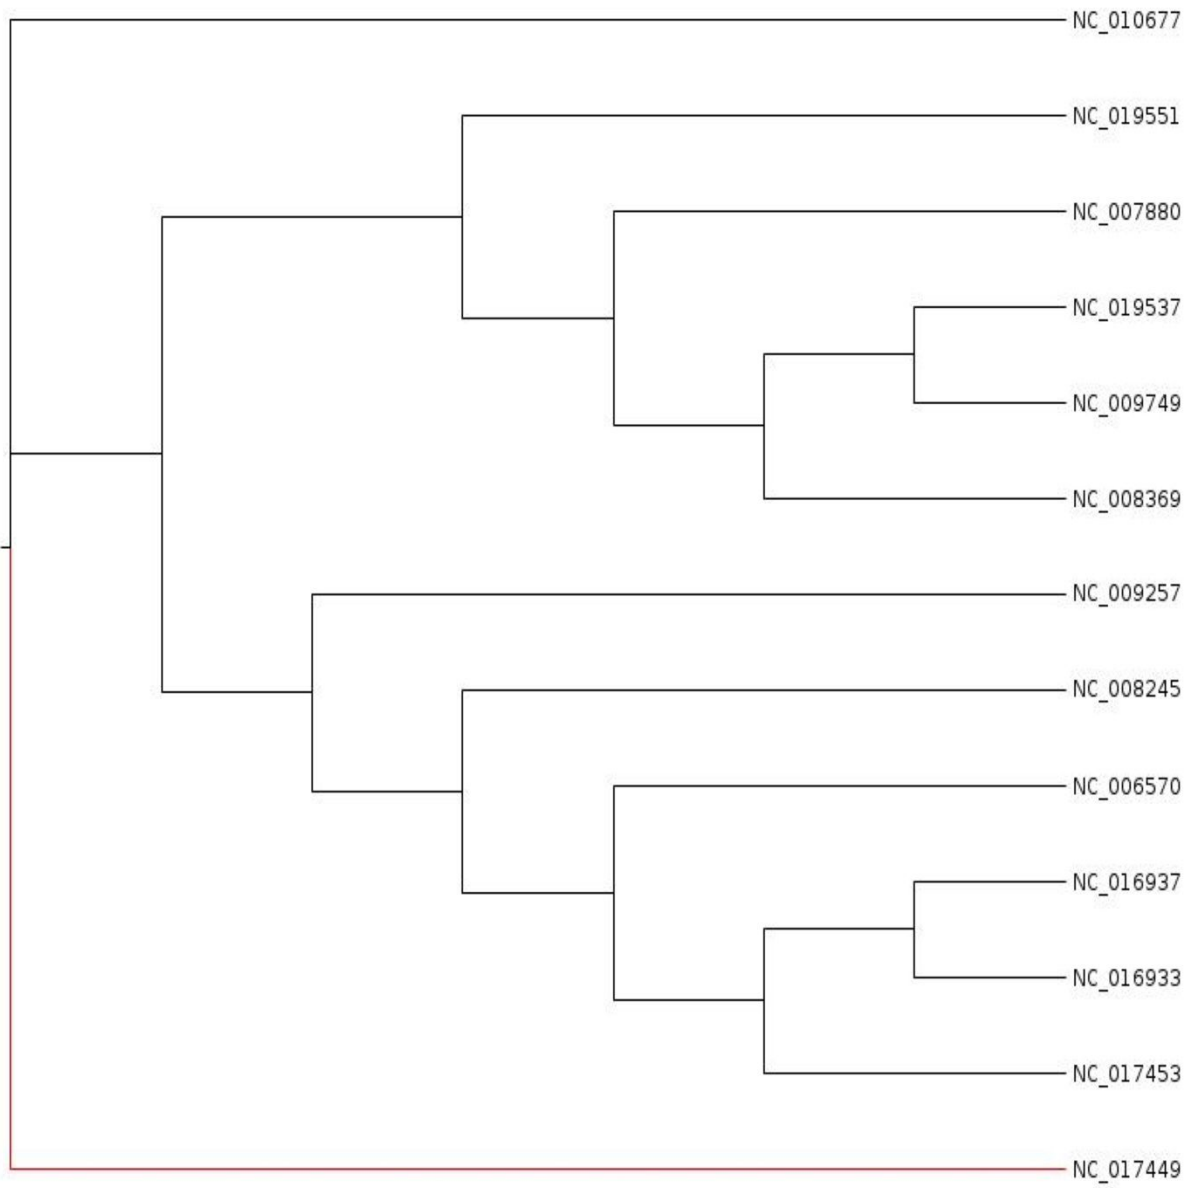



***H. influenzae***

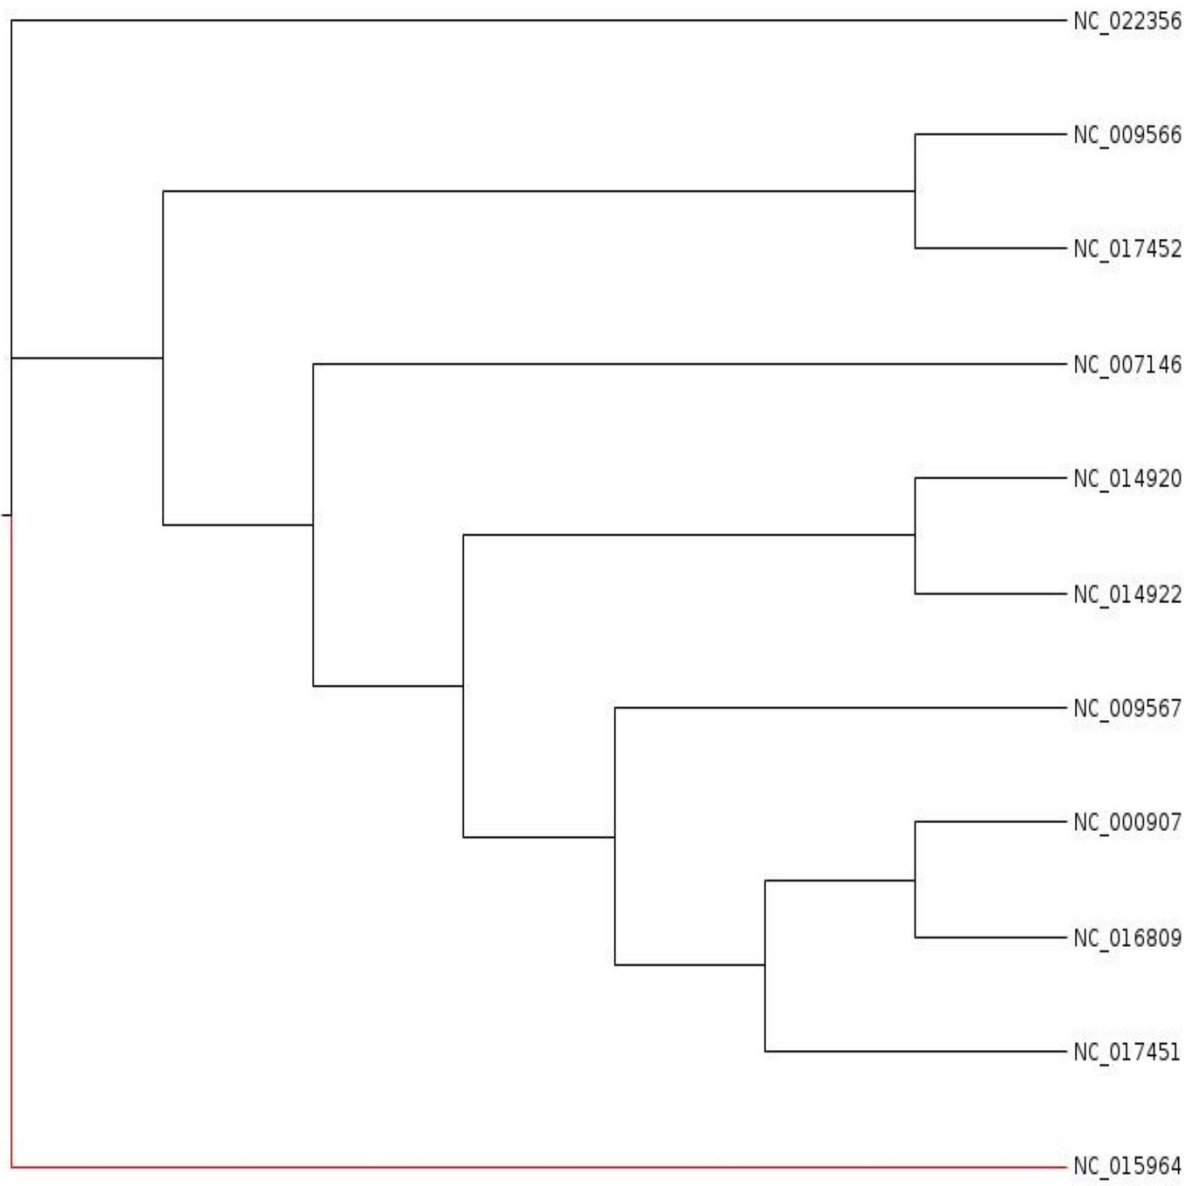

***L. monocytogenes***

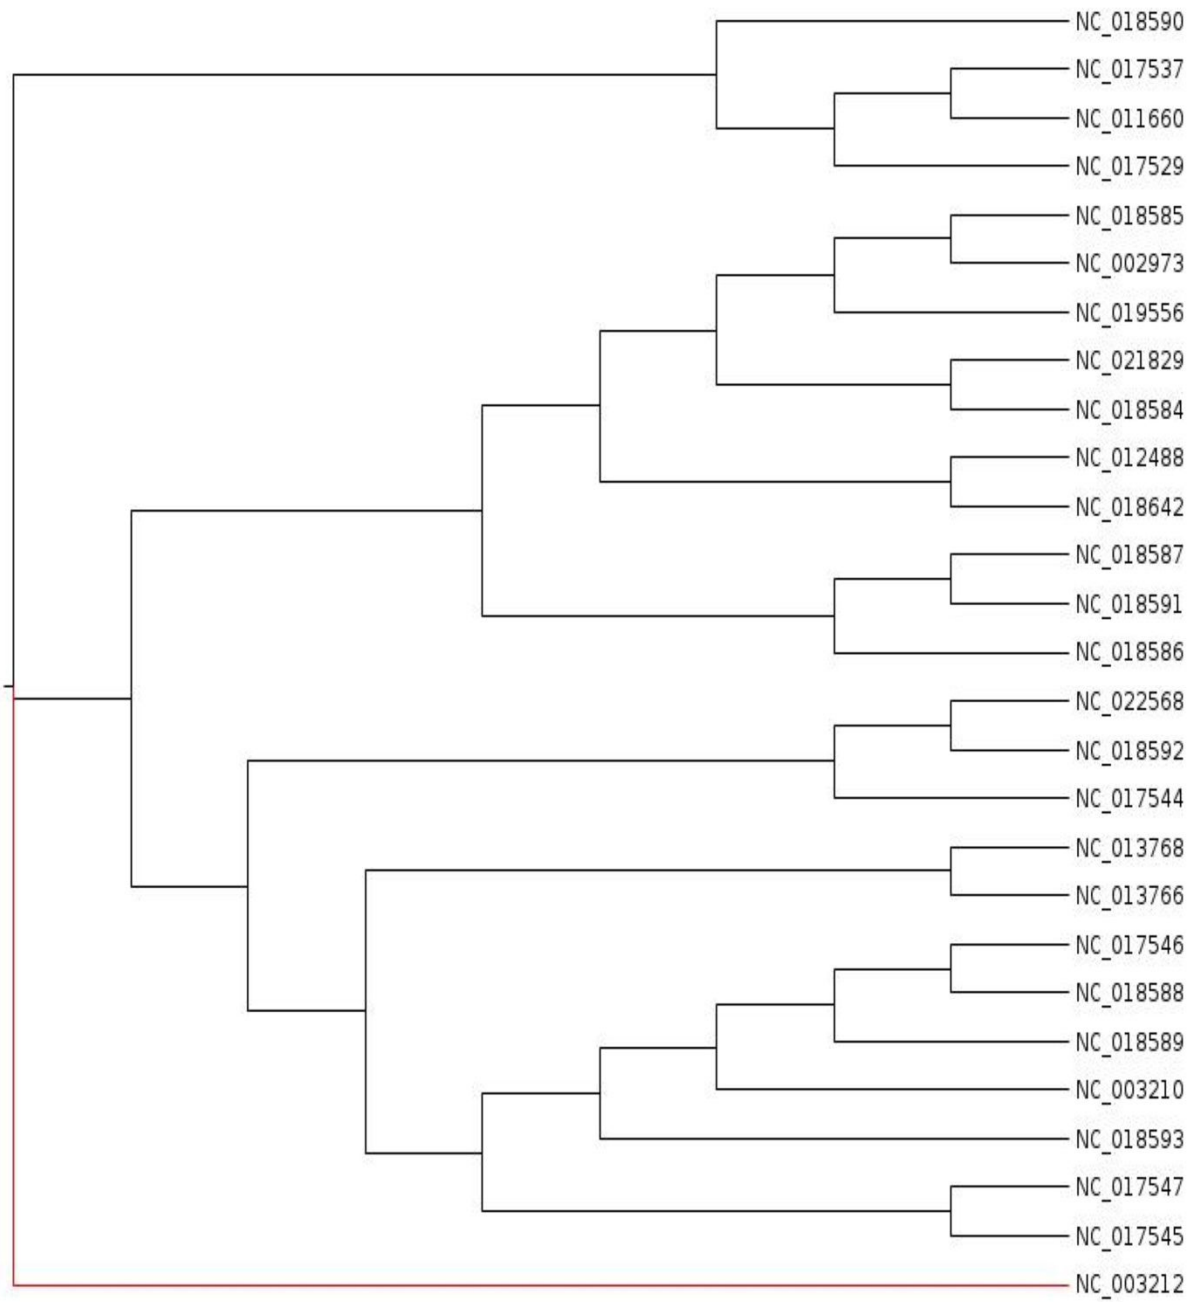

# MTBC

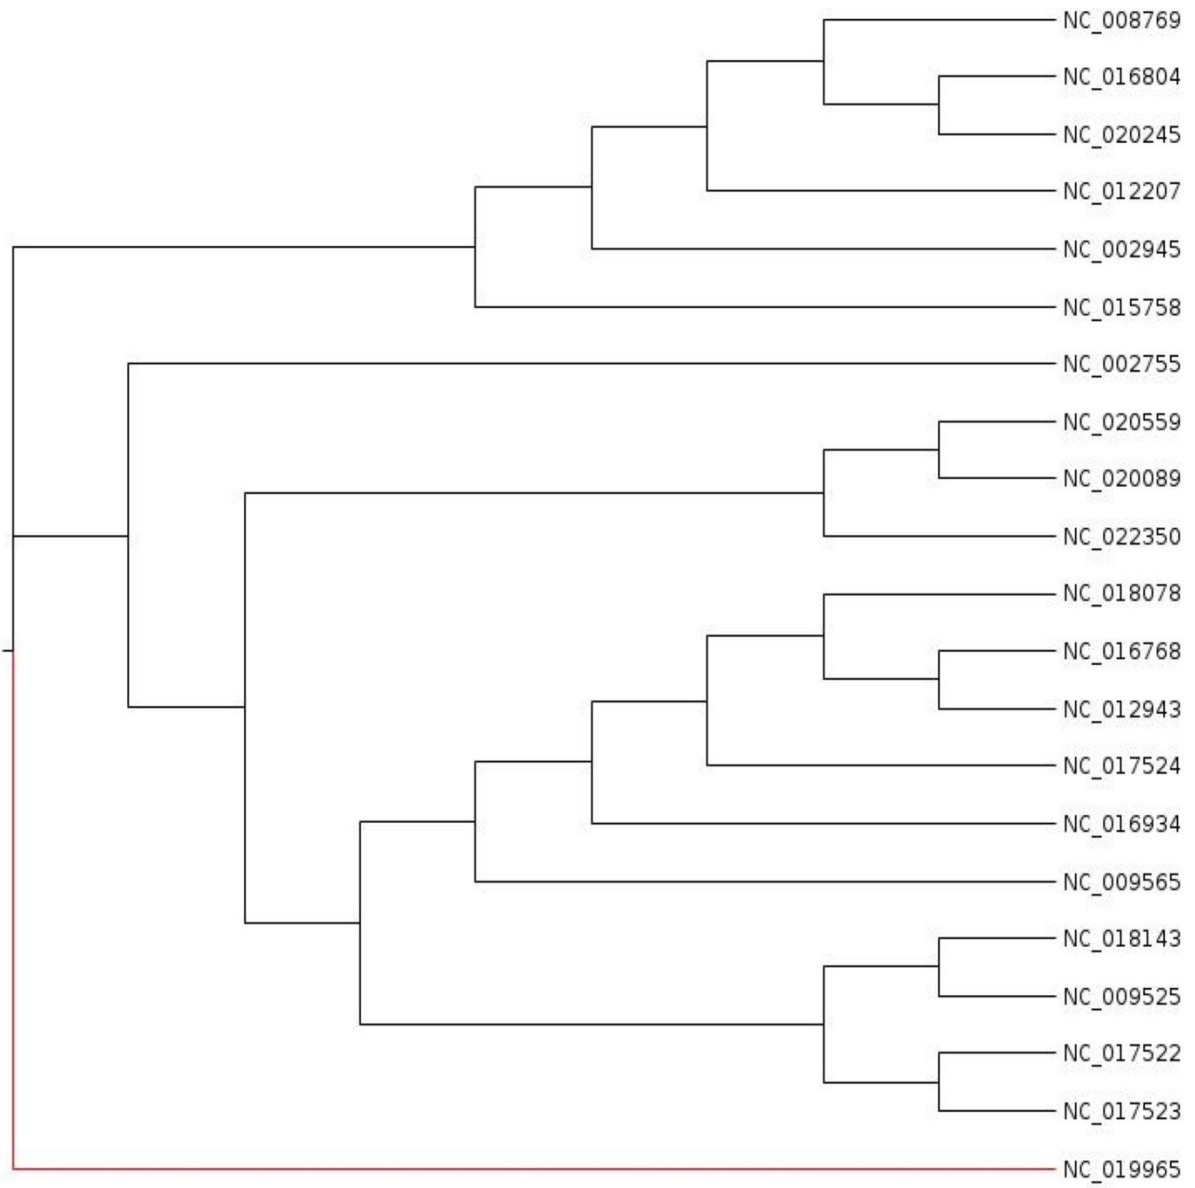

***N. meningitidis***

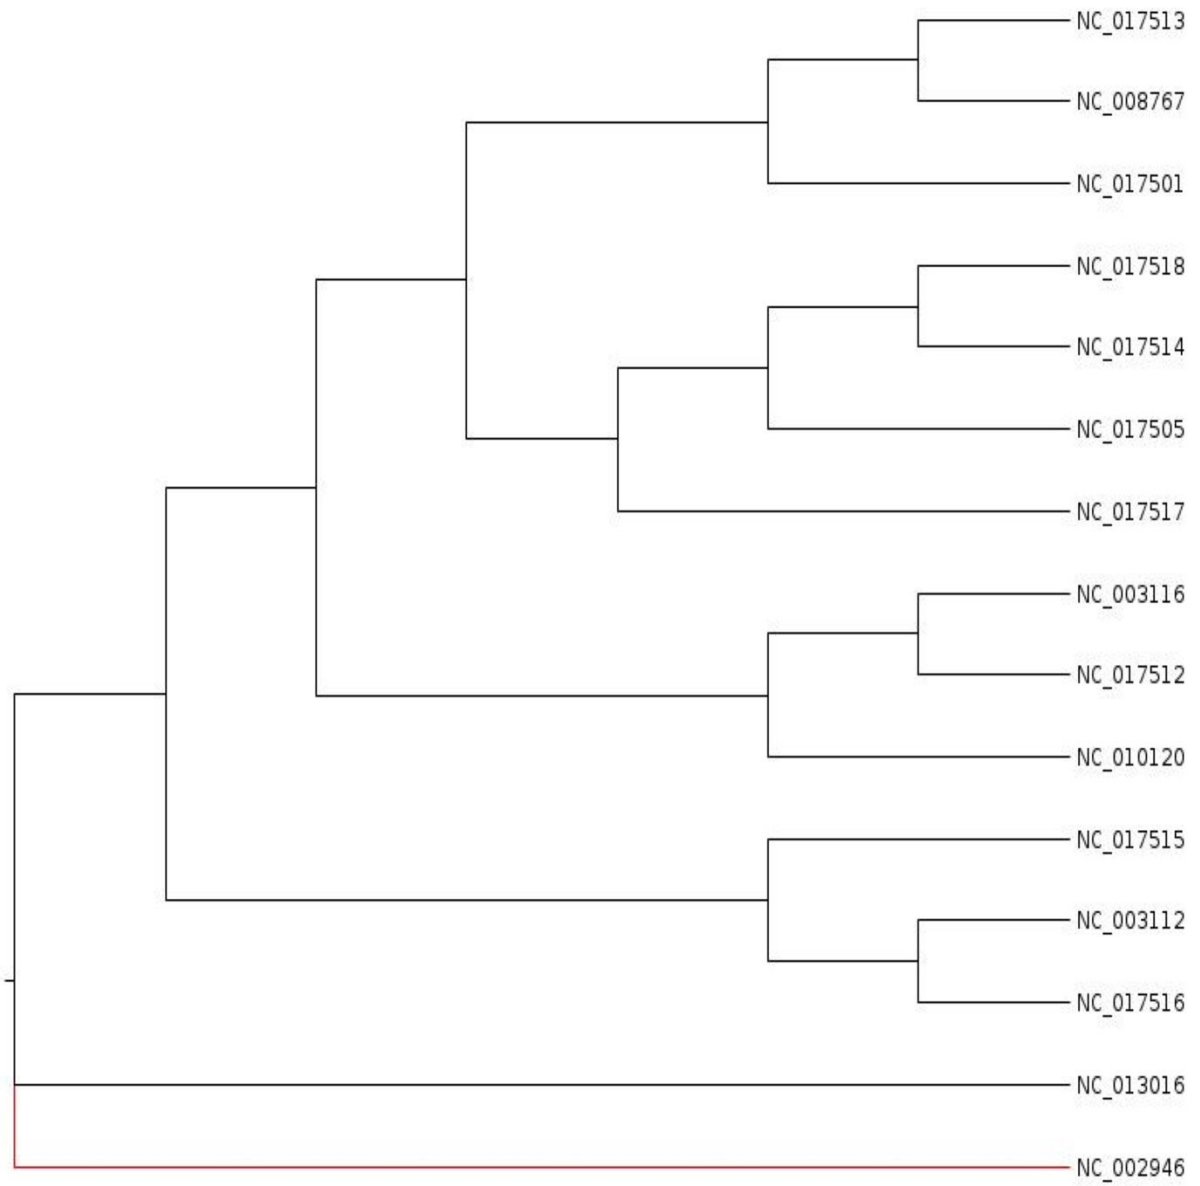

***P. aeruginosa***

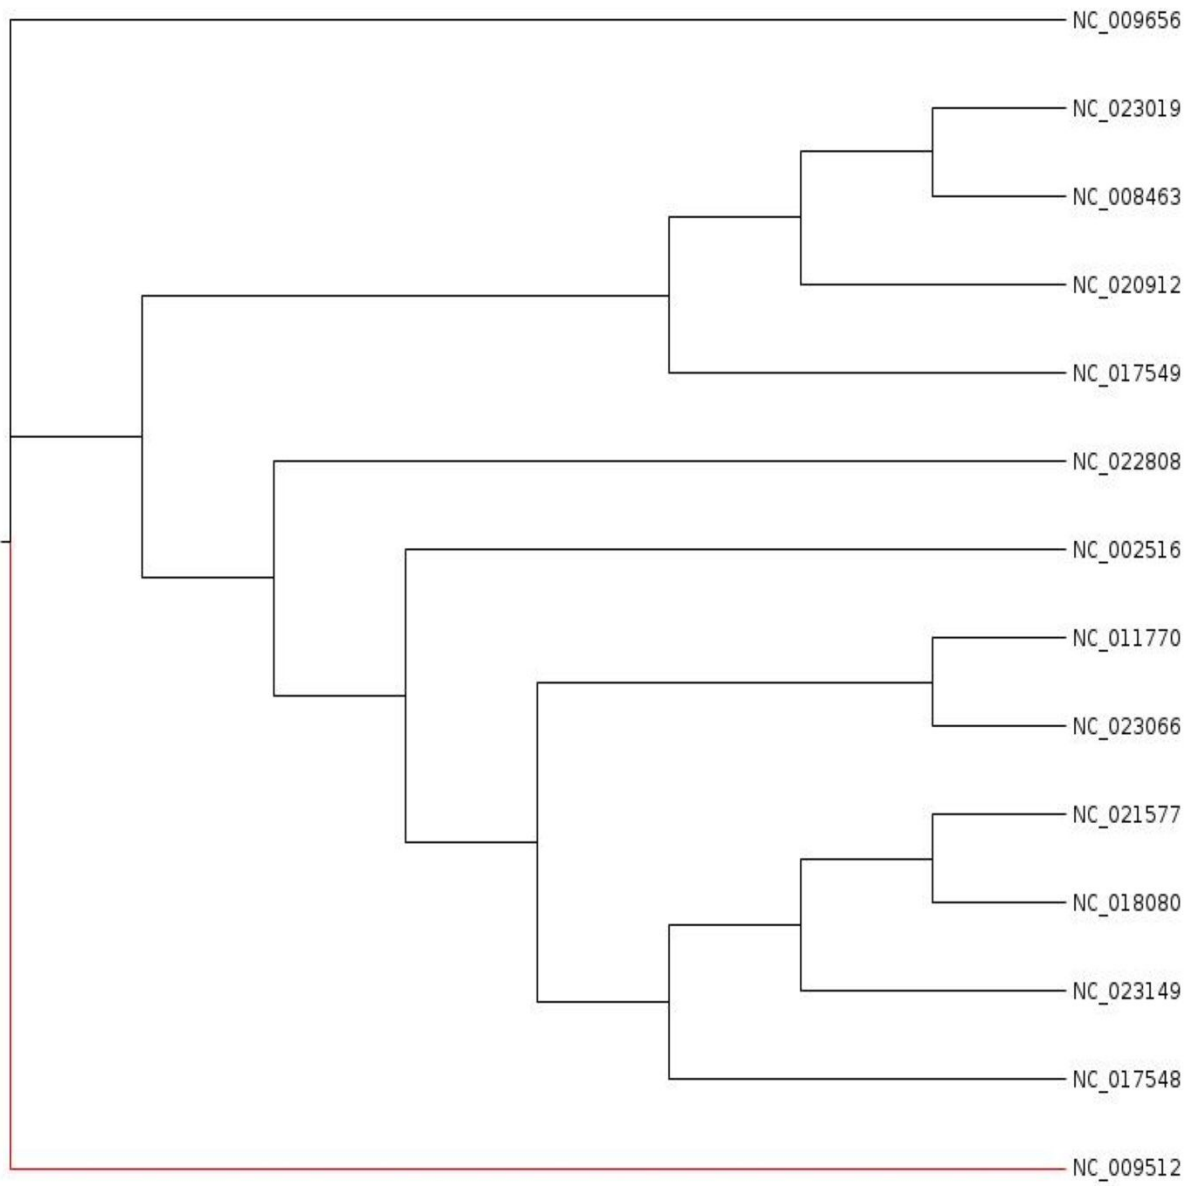

***S. pneumoniae***

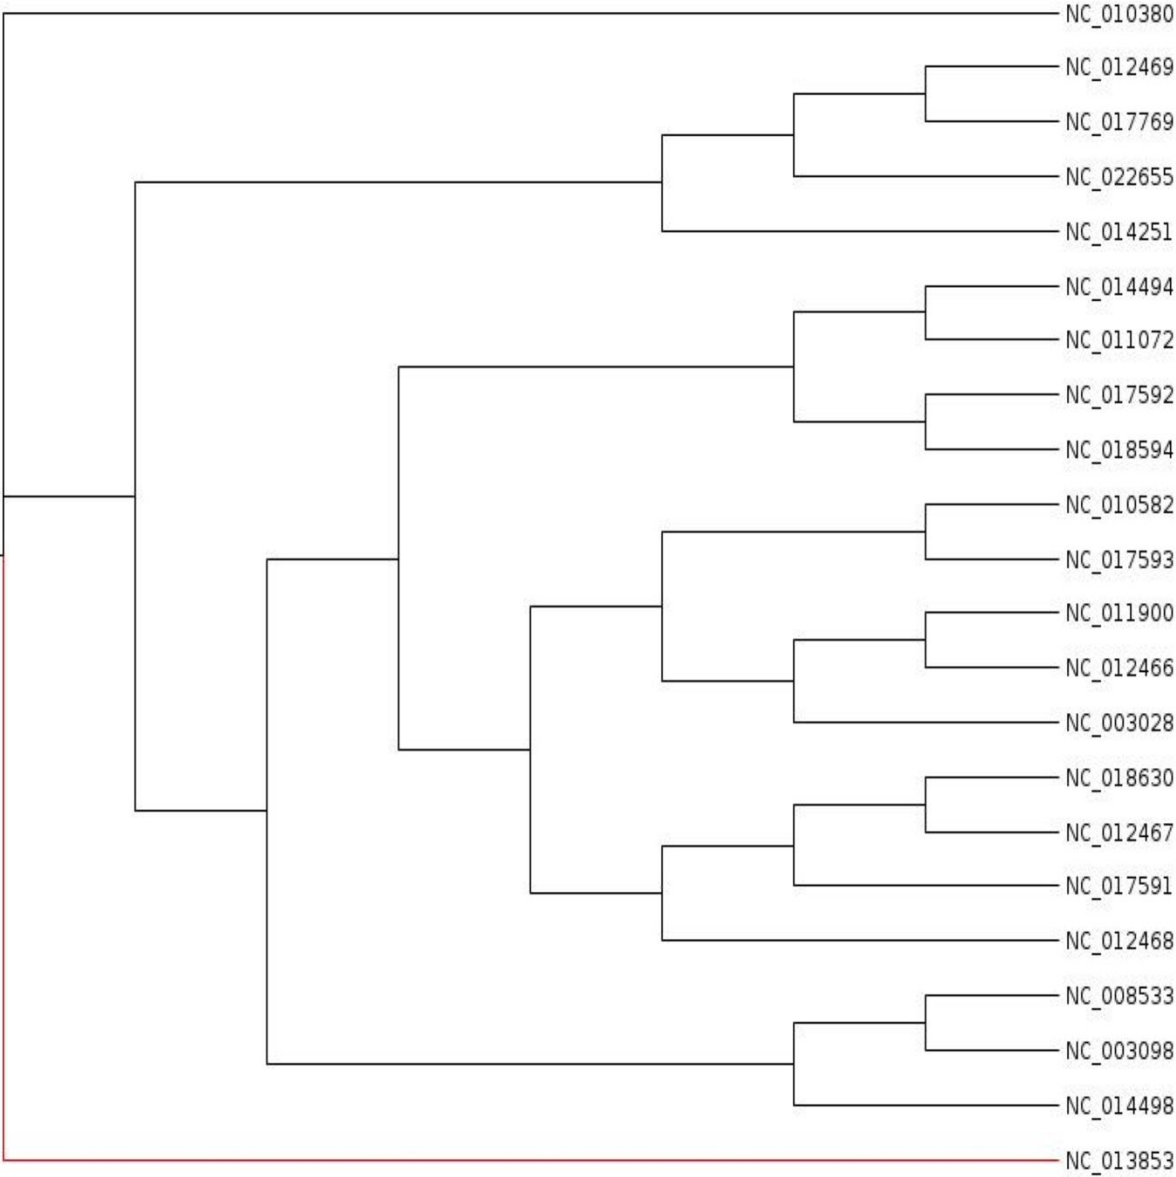

***S. suis***

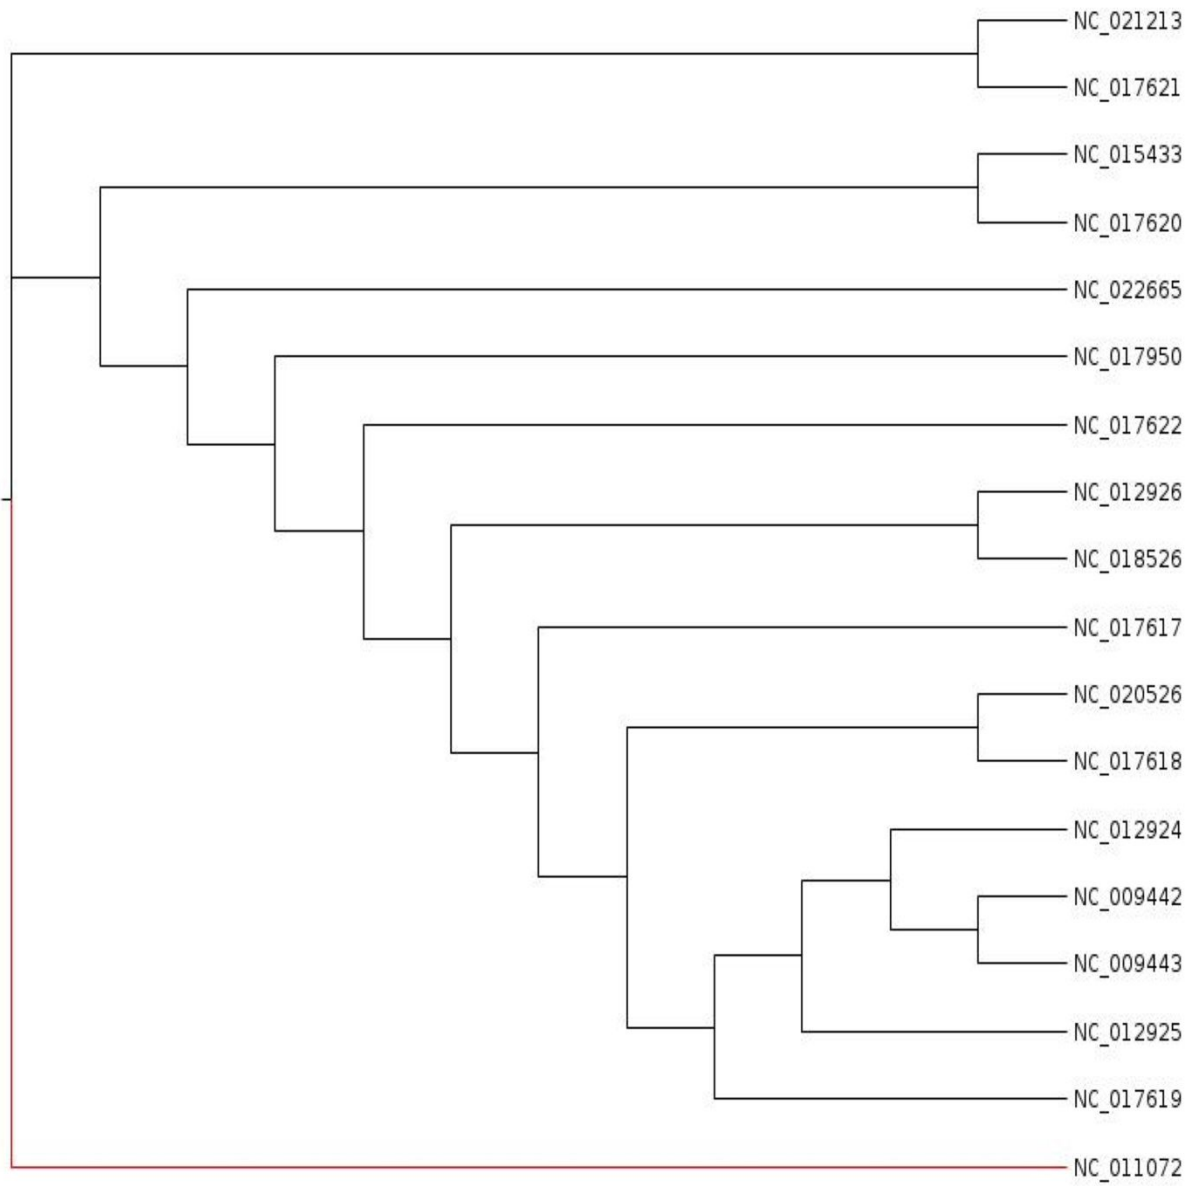

## *Y. pestis*

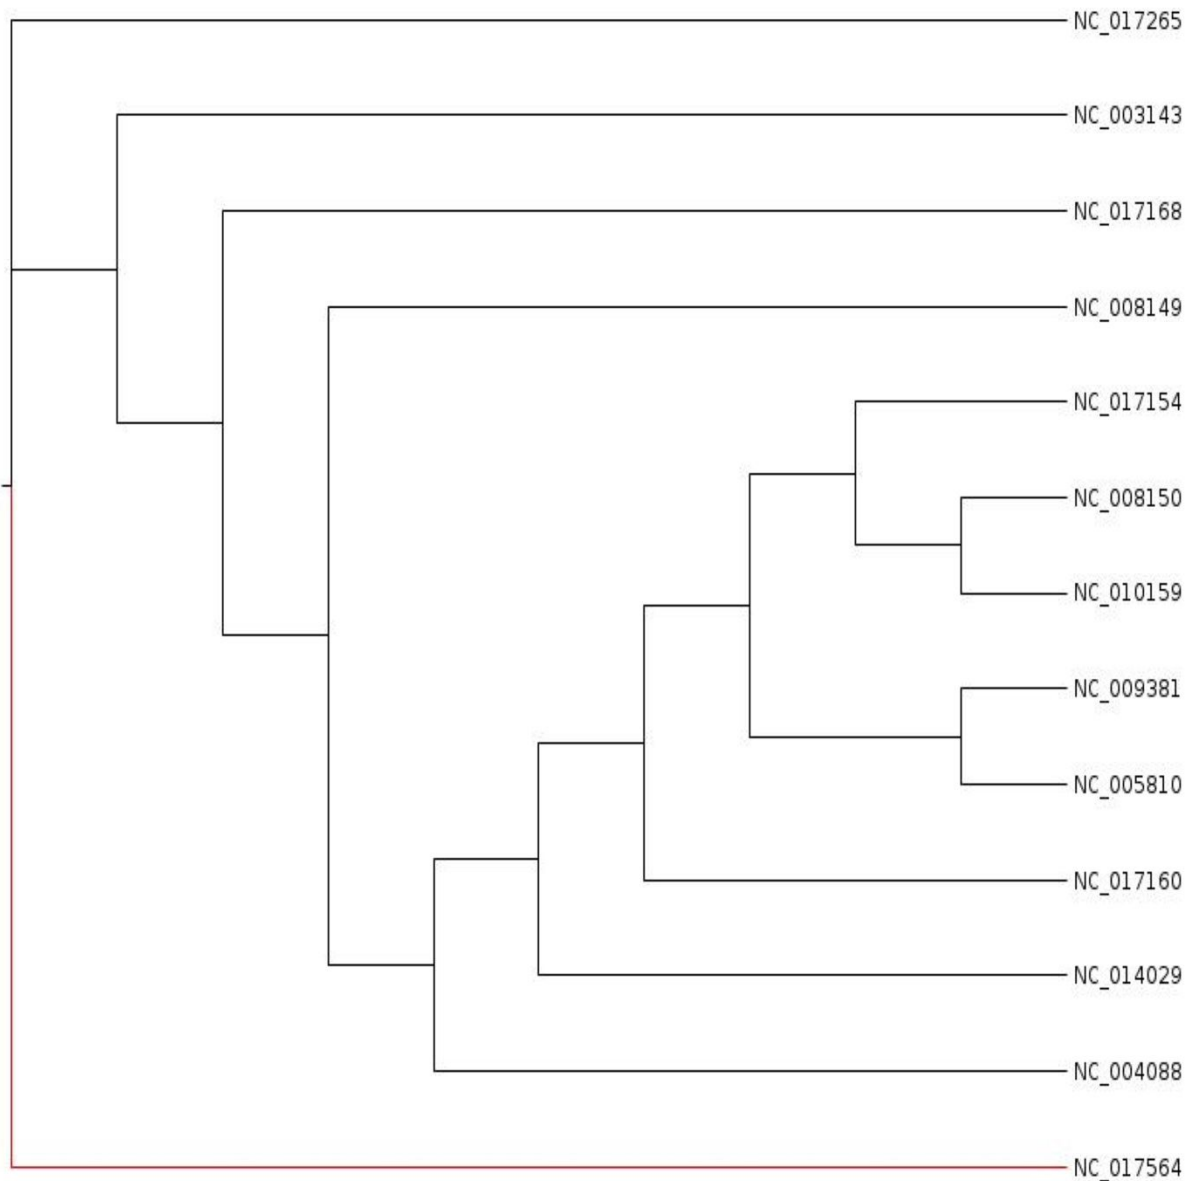

**Figure S1. Phylogentic relations between the strains in the investigated bacterial species/groups based on the average sequence dissimilarity between the “core” non-recombining genes in the NCBI-annotated pangenomes. The branch leading to an outgroup strain is shown in red.**



**Table S1.** NCBI accession numbers and names of the investigated bacterial strains. The names here are given as they appear in the NCBI annotation files.

| <i>Bacillus cereus</i>      |                                                     |
|-----------------------------|-----------------------------------------------------|
| Accession number            | Strain Name                                         |
| NC_003909                   | Bacillus cereus ATCC 10987                          |
| NC_004722                   | Bacillus cereus ATCC 14579                          |
| NC_006274                   | Bacillus cereus E33L                                |
| NC_011658                   | Bacillus cereus AH187                               |
| NC_011725                   | Bacillus cereus B4264                               |
| NC_011772                   | Bacillus cereus G9842                               |
| NC_011773                   | Bacillus cereus AH820                               |
| NC_011969                   | Bacillus cereus Q1                                  |
| NC_012472                   | Bacillus cereus 03BB102                             |
| NC_014335                   | Bacillus cereus biovar anthracis str. CI            |
| NC_016771                   | Bacillus cereus NC7401                              |
| NC_016779                   | Bacillus cereus F837/76                             |
| NC_018491                   | Bacillus cereus FRI-35                              |
| <i>Campylobacter jejuni</i> |                                                     |
| Accession number            | Strain Name                                         |
| NC_003912                   | Campylobacter jejuni RM1221                         |
| NC_008787                   | Campylobacter jejuni subsp. jejuni 81-176           |
| NC_009707                   | Campylobacter jejuni subsp. doylei 269.97           |
| NC_009839                   | Campylobacter jejuni subsp. jejuni 81116            |
| NC_014802                   | Campylobacter jejuni subsp. jejuni ICDCJ07001       |
| NC_017279                   | Campylobacter jejuni subsp. jejuni IA3902           |
| NC_017280                   | Campylobacter jejuni subsp. jejuni M1               |
| NC_017281                   | Campylobacter jejuni subsp. jejuni S3               |
| NC_018521                   | Campylobacter jejuni subsp. jejuni NCTC 11168-BN148 |
| NC_018709                   | Campylobacter jejuni subsp. jejuni PT14             |
| NC_022352                   | Campylobacter jejuni subsp. jejuni 00-2426          |
| NC_022353                   | Campylobacter jejuni subsp. jejuni 00-2544          |
| NC_022529                   | Campylobacter jejuni 4031                           |

| <i>Clostridium botulinum</i>              |                                           |
|-------------------------------------------|-------------------------------------------|
| <b>Accession number</b>                   | <b>Strain Name</b>                        |
| NC_009495                                 | Clostridium botulinum A str. ATCC 3502    |
| NC_009697                                 | Clostridium botulinum A str. ATCC 19397   |
| NC_009698                                 | Clostridium botulinum A str. Hall         |
| NC_009699                                 | Clostridium botulinum F str. Langeland    |
| NC_010516                                 | Clostridium botulinum B1 str. Okra        |
| NC_010520                                 | Clostridium botulinum A3 str. Loch Maree  |
| NC_012563                                 | Clostridium botulinum A2 str. Kyoto       |
| NC_012658                                 | Clostridium botulinum Ba4 str. 657        |
| NC_017297                                 | Clostridium botulinum F str. 230613       |
| NC_017299                                 | Clostridium botulinum H04402 065          |
| <i>Corynebacterium diphtheriae</i>        |                                           |
| <b>Accession number</b>                   | <b>Strain Name</b>                        |
| NC_002935                                 | Corynebacterium diphtheriae NCTC 13129    |
| NC_016782                                 | Corynebacterium diphtheriae 241           |
| NC_016783                                 | Corynebacterium diphtheriae INCA 402      |
| NC_016785                                 | Corynebacterium diphtheriae CDCE 8392     |
| NC_016786                                 | Corynebacterium diphtheriae HC01          |
| NC_016787                                 | Corynebacterium diphtheriae HC03          |
| NC_016788                                 | Corynebacterium diphtheriae HC04          |
| NC_016789                                 | Corynebacterium diphtheriae PW8           |
| NC_016790                                 | Corynebacterium diphtheriae VA01          |
| NC_016799                                 | Corynebacterium diphtheriae 31A           |
| NC_016800                                 | Corynebacterium diphtheriae BH8           |
| NC_016801                                 | Corynebacterium diphtheriae C7 (beta)     |
| NC_016802                                 | Corynebacterium diphtheriae HC02          |
| <i>Corynebacterium pseudotuberculosis</i> |                                           |
| <b>Accession number</b>                   | <b>Strain Name</b>                        |
| NC_014329                                 | Corynebacterium pseudotuberculosis FRC41  |
| NC_016781                                 | Corynebacterium pseudotuberculosis 3/99-5 |
| NC_016932                                 | Corynebacterium pseudotuberculosis 316    |

|                                         |                                              |
|-----------------------------------------|----------------------------------------------|
| NC_017031                               | Corynebacterium pseudotuberculosis P54B96    |
| NC_017300                               | Corynebacterium pseudotuberculosis 1002      |
| NC_017301                               | Corynebacterium pseudotuberculosis C231      |
| NC_017303                               | Corynebacterium pseudotuberculosis I19       |
| NC_017305                               | Corynebacterium pseudotuberculosis PAT10     |
| NC_017306                               | Corynebacterium pseudotuberculosis 42/02-A   |
| NC_017307                               | Corynebacterium pseudotuberculosis CIP 52.97 |
| NC_017308                               | Corynebacterium pseudotuberculosis 1/06-A    |
| NC_017462                               | Corynebacterium pseudotuberculosis 267       |
| NC_017730                               | Corynebacterium pseudotuberculosis 31        |
| NC_017945                               | Corynebacterium pseudotuberculosis 258       |
| NC_018019                               | Corynebacterium pseudotuberculosis Cp162     |
| <b><i>Escherichia coli-Shigella</i></b> |                                              |
| <b>Accession number</b>                 | <b>Strain Name</b>                           |
| NC_000913                               | Escherichia coli str. K-12 substr. MG1655    |
| NC_002655                               | Escherichia coli O157:H7 str. EDL933         |
| NC_002695                               | Escherichia coli O157:H7 str. Sakai          |
| NC_004431                               | Escherichia coli CFT073                      |
| NC_007779                               | Escherichia coli str. K-12 substr. W3110     |
| NC_007946                               | Escherichia coli UTI89                       |
| NC_008253                               | Escherichia coli 536                         |
| NC_008563                               | Escherichia coli APEC O1                     |
| NC_009800                               | Escherichia coli HS                          |
| NC_009801                               | Escherichia coli E24377A                     |
| NC_010468                               | Escherichia coli ATCC 8739                   |
| NC_010498                               | Escherichia coli SMS-3-5                     |
| NC_011353                               | Escherichia coli O157:H7 str. EC4115         |
| NC_011415                               | Escherichia coli SE11                        |
| NC_011601                               | Escherichia coli O127:H6 str. E2348/69       |
| NC_011741                               | Escherichia coli IAI1                        |
| NC_011742                               | Escherichia coli S88                         |
| NC_011745                               | Escherichia coli ED1a                        |

|           |                                           |
|-----------|-------------------------------------------|
| NC_011748 | Escherichia coli 55989                    |
| NC_011750 | Escherichia coli IAI39                    |
| NC_011751 | Escherichia coli UMN026                   |
| NC_011993 | Escherichia coli LF82                     |
| NC_012759 | Escherichia coli BW2952                   |
| NC_012967 | Escherichia coli B str. REL606            |
| NC_012971 | Escherichia coli BL21(DE3)                |
| NC_013008 | Escherichia coli O157:H7 str. TW14359     |
| NC_013353 | Escherichia coli O103:H2 str. 12009       |
| NC_013361 | Escherichia coli O26:H11 str. 11368       |
| NC_013364 | Escherichia coli O111:H- str. 11128       |
| NC_013654 | Escherichia coli SE15                     |
| NC_013941 | Escherichia coli O55:H7 str. CB9615       |
| NC_016902 | Escherichia coli KO11FL                   |
| NC_017625 | Escherichia coli DH1                      |
| NC_017626 | Escherichia coli 042                      |
| NC_017628 | Escherichia coli IHE3034                  |
| NC_017631 | Escherichia coli ABU 83972                |
| NC_017633 | Escherichia coli ETEC H10407              |
| NC_017635 | Escherichia coli W                        |
| NC_017641 | Escherichia coli UMNK88                   |
| NC_017646 | Escherichia coli O7:K1 str. CE10          |
| NC_017652 | Escherichia coli str. 'clone D i14'       |
| NC_017656 | Escherichia coli O55:H7 str. RM12579      |
| NC_017663 | Escherichia coli P12b                     |
| NC_017906 | Escherichia coli Xuzhou21                 |
| NC_018650 | Escherichia coli O104:H4 str. 2009EL-2050 |
| NC_018658 | Escherichia coli O104:H4 str. 2011C-3493  |
| NC_018661 | Escherichia coli O104:H4 str. 2009EL-2071 |
| NC_020163 | Escherichia coli APEC O78                 |
| NC_022364 | Escherichia coli LY180                    |
| NC_022370 | Escherichia coli PMV-1                    |

|                                      |                                                     |
|--------------------------------------|-----------------------------------------------------|
| NC_022648                            | Escherichia coli JJ1886                             |
| NC_004337                            | Shigella flexneri 2a str. 301                       |
| NC_004741                            | Shigella flexneri 2a str. 2457T                     |
| NC_007384                            | Shigella sonnei Ss046                               |
| NC_007606                            | Shigella dysenteriae Sd197                          |
| NC_007613                            | Shigella boydii Sb227                               |
| NC_008258                            | Shigella flexneri 5 str. 8401                       |
| NC_010658                            | Shigella boydii CDC 3083-94                         |
| NC_016822                            | Shigella sonnei 53G                                 |
| NC_017328                            | Shigella flexneri 2002017                           |
| <b><i>Francisella tularensis</i></b> |                                                     |
| <b>Accession number</b>              | <b>Strain Name</b>                                  |
| NC_006570                            | Francisella tularensis subsp. tularensis SCHU S4    |
| NC_007880                            | Francisella tularensis subsp. holarctica LVS        |
| NC_008245                            | Francisella tularensis subsp. tularensis FSC198     |
| NC_008369                            | Francisella tularensis subsp. holarctica OSU18      |
| NC_009257                            | Francisella tularensis subsp. tularensis WY96-3418  |
| NC_009749                            | Francisella tularensis subsp. holarctica FTNF002-00 |
| NC_010677                            | Francisella tularensis subsp. mediasiatica FSC147   |
| NC_016933                            | Francisella tularensis TIGB03                       |
| NC_016937                            | Francisella tularensis subsp. tularensis TI0902     |
| NC_017453                            | Francisella tularensis subsp. tularensis NE061598   |
| NC_019537                            | Francisella tularensis subsp. holarctica F92        |
| NC_019551                            | Francisella tularensis subsp. holarctica FSC200     |
| <b><i>Haemophilus influenzae</i></b> |                                                     |
| <b>Accession number</b>              | <b>Strain Name</b>                                  |
| NC_000907                            | Haemophilus influenzae Rd KW20                      |
| NC_007146                            | Haemophilus influenzae 86-028NP                     |
| NC_009566                            | Haemophilus influenzae PittEE                       |
| NC_009567                            | Haemophilus influenzae PittGG                       |
| NC_014920                            | Haemophilus influenzae F3031                        |
| NC_014922                            | Haemophilus influenzae F3047                        |

|                                      |                                                 |
|--------------------------------------|-------------------------------------------------|
| NC_016809                            | Haemophilus influenzae 10810                    |
| NC_017451                            | Haemophilus influenzae R2866                    |
| NC_017452                            | Haemophilus influenzae R2846                    |
| NC_022356                            | Haemophilus influenzae KR494                    |
| <b><i>Listeria monocytogenes</i></b> |                                                 |
| <b>Accession number</b>              | <b>Strain Name</b>                              |
| NC_002973                            | Listeria monocytogenes serotype 4b str. F2365   |
| NC_003210                            | Listeria monocytogenes EGD-e                    |
| NC_011660                            | Listeria monocytogenes HCC23                    |
| NC_012488                            | Listeria monocytogenes Clip81459                |
| NC_013766                            | Listeria monocytogenes 08-5578                  |
| NC_013768                            | Listeria monocytogenes 08-5923                  |
| NC_017529                            | Listeria monocytogenes L99                      |
| NC_017537                            | Listeria monocytogenes M7                       |
| NC_017544                            | Listeria monocytogenes 10403S                   |
| NC_017545                            | Listeria monocytogenes J0161                    |
| NC_017546                            | Listeria monocytogenes FSL R2-561               |
| NC_017547                            | Listeria monocytogenes Finland 1998             |
| NC_018584                            | Listeria monocytogenes ATCC 19117               |
| NC_018585                            | Listeria monocytogenes SLCC2378                 |
| NC_018586                            | Listeria monocytogenes SLCC2540                 |
| NC_018587                            | Listeria monocytogenes SLCC2755                 |
| NC_018588                            | Listeria monocytogenes SLCC2372                 |
| NC_018589                            | Listeria monocytogenes SLCC2479                 |
| NC_018590                            | Listeria monocytogenes SLCC2376                 |
| NC_018591                            | Listeria monocytogenes serotype 7 str. SLCC2482 |
| NC_018592                            | Listeria monocytogenes SLCC5850                 |
| NC_018593                            | Listeria monocytogenes SLCC7179                 |
| NC_018642                            | Listeria monocytogenes L312                     |
| NC_019556                            | Listeria monocytogenes serotype 4b str. LL195   |
| NC_021829                            | Listeria monocytogenes J1816                    |
| NC_022568                            | Listeria monocytogenes EGD                      |

| <b><i>Mycobacterium tuberculosis</i> Complex</b> |                                                     |
|--------------------------------------------------|-----------------------------------------------------|
| <b>Accession number</b>                          | <b>Strain Name</b>                                  |
| NC_002755                                        | Mycobacterium tuberculosis CDC1551                  |
| NC_002945                                        | Mycobacterium bovis AF2122/97                       |
| NC_008769                                        | Mycobacterium bovis BCG str. Pasteur 1173P2         |
| NC_009525                                        | Mycobacterium tuberculosis H37Ra                    |
| NC_009565                                        | Mycobacterium tuberculosis F11                      |
| NC_012207                                        | Mycobacterium bovis BCG str. Tokyo 172              |
| NC_012943                                        | Mycobacterium tuberculosis KZN 1435                 |
| NC_015758                                        | Mycobacterium africanum GM041182                    |
| NC_016768                                        | Mycobacterium tuberculosis KZN 4207                 |
| NC_016804                                        | Mycobacterium bovis BCG str. Mexico                 |
| NC_016934                                        | Mycobacterium tuberculosis UT205                    |
| NC_017522                                        | Mycobacterium tuberculosis CCDC5180                 |
| NC_017523                                        | Mycobacterium tuberculosis CCDC5079                 |
| NC_017524                                        | Mycobacterium tuberculosis CTRI-2                   |
| NC_018078                                        | Mycobacterium tuberculosis KZN 605                  |
| NC_018143                                        | Mycobacterium tuberculosis H37Rv                    |
| NC_020089                                        | Mycobacterium tuberculosis 7199-99                  |
| NC_020245                                        | Mycobacterium bovis BCG str. Korea 1168P            |
| NC_020559                                        | Mycobacterium tuberculosis str. Erdman = ATCC 35801 |
| NC_022350                                        | Mycobacterium tuberculosis str. Haarlem             |
| <b><i>Neisseria meningitidis</i></b>             |                                                     |
| <b>Accession number</b>                          | <b>Strain Name</b>                                  |
| NC_003112                                        | Neisseria meningitidis MC58                         |
| NC_003116                                        | Neisseria meningitidis Z2491                        |
| NC_008767                                        | Neisseria meningitidis FAM18                        |
| NC_010120                                        | Neisseria meningitidis 053442                       |
| NC_013016                                        | Neisseria meningitidis alpha14                      |
| NC_017501                                        | Neisseria meningitidis 8013                         |
| NC_017505                                        | Neisseria meningitidis alpha710                     |
| NC_017512                                        | Neisseria meningitidis WUE 2594                     |

|                                        |                                       |
|----------------------------------------|---------------------------------------|
| NC_017513                              | Neisseria meningitidis G2136          |
| NC_017514                              | Neisseria meningitidis M01-240149     |
| NC_017515                              | Neisseria meningitidis M04-240196     |
| NC_017516                              | Neisseria meningitidis H44/76         |
| NC_017517                              | Neisseria meningitidis M01-240355     |
| NC_017518                              | Neisseria meningitidis NZ-05/33       |
| <b><i>Pseudomonas aeruginosa</i></b>   |                                       |
| <b>Accession number</b>                | <b>Strain Name</b>                    |
| NC_002516                              | Pseudomonas aeruginosa PAO1           |
| NC_008463                              | Pseudomonas aeruginosa UCBPP-PA14     |
| NC_009656                              | Pseudomonas aeruginosa PA7            |
| NC_011770                              | Pseudomonas aeruginosa LESB58         |
| NC_017548                              | Pseudomonas aeruginosa M18            |
| NC_017549                              | Pseudomonas aeruginosa NCGM2.S1       |
| NC_018080                              | Pseudomonas aeruginosa DK2            |
| NC_020912                              | Pseudomonas aeruginosa B136-33        |
| NC_021577                              | Pseudomonas aeruginosa RP73           |
| NC_022808                              | Pseudomonas aeruginosa PA1            |
| NC_023019                              | Pseudomonas aeruginosa MTB-1          |
| NC_023066                              | Pseudomonas aeruginosa LES431         |
| NC_023149                              | Pseudomonas aeruginosa SCV20265       |
| <b><i>Streptococcus pneumoniae</i></b> |                                       |
| <b>Accession number</b>                | <b>Strain Name</b>                    |
| NC_003028                              | Streptococcus pneumoniae TIGR4        |
| NC_003098                              | Streptococcus pneumoniae R6           |
| NC_008533                              | Streptococcus pneumoniae D39          |
| NC_010380                              | Streptococcus pneumoniae Hungary19A-6 |
| NC_010582                              | Streptococcus pneumoniae CGSP14       |
| NC_011072                              | Streptococcus pneumoniae G54          |
| NC_011900                              | Streptococcus pneumoniae ATCC 700669  |
| NC_012466                              | Streptococcus pneumoniae JJA          |
| NC_012467                              | Streptococcus pneumoniae P1031        |



|                                  |                                       |
|----------------------------------|---------------------------------------|
| NC_012468                        | Streptococcus pneumoniae 70585        |
| NC_012469                        | Streptococcus pneumoniae Taiwan19F-14 |
| NC_014251                        | Streptococcus pneumoniae TCH8431/19A  |
| NC_014494                        | Streptococcus pneumoniae AP200        |
| NC_014498                        | Streptococcus pneumoniae 670-6B       |
| NC_017591                        | Streptococcus pneumoniae INV104       |
| NC_017592                        | Streptococcus pneumoniae OXC141       |
| NC_017593                        | Streptococcus pneumoniae INV200       |
| NC_017769                        | Streptococcus pneumoniae ST556        |
| NC_018594                        | Streptococcus pneumoniae SPNA45       |
| NC_018630                        | Streptococcus pneumoniae PNI0373      |
| NC_022655                        | Streptococcus pneumoniae A026         |
| <b><i>Streptococcus suis</i></b> |                                       |
| <b>Accession number</b>          | <b>Strain Name</b>                    |
| NC_009442                        | Streptococcus suis 05ZYH33            |
| NC_009443                        | Streptococcus suis 98HAH33            |
| NC_012924                        | Streptococcus suis SC84               |
| NC_012925                        | Streptococcus suis P1/7               |
| NC_012926                        | Streptococcus suis BM407              |
| NC_015433                        | Streptococcus suis ST3                |
| NC_017617                        | Streptococcus suis GZ1                |
| NC_017618                        | Streptococcus suis JS14               |
| NC_017619                        | Streptococcus suis SS12               |
| NC_017620                        | Streptococcus suis D9                 |
| NC_017621                        | Streptococcus suis D12                |
| NC_017622                        | Streptococcus suis A7                 |
| NC_017950                        | Streptococcus suis ST1                |
| NC_018526                        | Streptococcus suis S735               |
| NC_020526                        | Streptococcus suis SC070731           |
| NC_021213                        | Streptococcus suis TL13               |
| NC_022665                        | Streptococcus suis T15                |
| <b><i>Yersinia pestis</i></b>    |                                       |

| <b>Accession number</b> | <b>Strain Name</b>                               |
|-------------------------|--------------------------------------------------|
| NC_003143               | Yersinia pestis CO92                             |
| NC_004088               | Yersinia pestis KIM 10                           |
| NC_005810               | Yersinia pestis biovar Microtus str. 91001       |
| NC_008149               | Yersinia pestis Nepal516                         |
| NC_008150               | Yersinia pestis Antiqua                          |
| NC_009381               | Yersinia pestis Pestoides F                      |
| NC_010159               | Yersinia pestis Angola                           |
| NC_014029               | Yersinia pestis Z176003                          |
| NC_017154               | Yersinia pestis D106004                          |
| NC_017160               | Yersinia pestis D182038                          |
| NC_017168               | Yersinia pestis A1122                            |
| NC_017265               | Yersinia pestis biovar Medievalis str. Harbin 35 |

**Table S2.** Comparison of differences in the evolutionary conservation values between the “core”, “single-loss” and “multiple-loss” pangene groups in the NCBI-annotated pangenomes using one-sided Mann-Whitney-Wilcoxon test

| <b>Organism</b>                | <b>Compared gene-loss groups</b> | <b>Number of pangenes in each group</b> | <b>U-test W</b> | <b>P-value</b> |
|--------------------------------|----------------------------------|-----------------------------------------|-----------------|----------------|
| <i>B. cereus</i>               | “Core” – “Single-loss”           | 3165, 512                               | 998591          | < 2.2E-16      |
|                                | “Single-loss” – “Multiple-loss”  | 512, 118                                | 36078           | 4.90E-04       |
| <i>C. botulinum</i>            | “Core” – “Single-loss”           | 2270, 479                               | 678352          | < 2.2E-16      |
|                                | “Single-loss” – “Multiple-loss”  | 479, 112                                | 29994           | 2.56E-02       |
| <i>C. diphtheriae</i>          | “Core” – “Single-loss”           | 1630, 119                               | 130960          | 8.37E-11       |
|                                | “Single-loss” – “Multiple-loss”  | 119, 26                                 | 1983.5          | 1.21E-02       |
| <i>C. jejuni</i>               | “Core” – “Single-loss”           | 1012, 322                               | 190080          | 3.23E-06       |
|                                | “Single-loss” – “Multiple-loss”  | 322, 38                                 | 7562.5          | 8.61E-03       |
| <i>C. pseudotuberculosis</i> * | “Core” – “Single-loss”           | 1471, 298                               | 275880          | 8.82E-13       |
|                                | “Single-loss” – “Multiple-loss”  | 298, 117                                | 22620           | 1.17E-06       |
| <i>E. coli-Shigella</i>        | “Core” – “Single-loss”           | 1456, 639                               | 578800          | < 2.2E-16      |
|                                | “Single-loss” – “Multiple-loss”  | 639, 986                                | 411030          | < 2.2E-16      |
| <i>F. tularensis</i> *         | “Core” – “Single-loss”           | 1010, 130                               | 83878           | 1.02E-07       |
|                                | “Single-loss” – “Multiple-loss”  | 130, 56                                 | 4805.5          | 2.45E-04       |
| <i>H. influenzae</i>           | “Core” – “Single-loss”           | 1026, 300                               | 172400          | 7.61E-04       |
|                                | “Single-loss” –                  | 300, 54                                 | 10507           | 2.54E-04       |

|                         |                                 |           |         |           |
|-------------------------|---------------------------------|-----------|---------|-----------|
|                         | “Multiple-loss”                 |           |         |           |
| <i>L. monocytogenes</i> | “Core” – “Single-loss”          | 2174, 296 | 413100  | 1.01E-15  |
|                         | “Single-loss” – “Multiple-loss” | 296, 61   | 11106   | 2.28E-03  |
| <b>MTBC*</b>            | “Core” – “Single-loss”          | 2665, 527 | 832030  | 9.39E-12  |
|                         | “Single-loss” – “Multiple-loss” | 527, 219  | 79458   | 2.35E-16  |
| <i>N. meningitidis</i>  | “Core” – “Single-loss”          | 1270, 133 | 120970  | < 2.2E-16 |
|                         | “Single-loss” – “Multiple-loss” | 133, 66   | 5892    | 4.03E-05  |
| <i>P. aeruginosa</i>    | “Core” – “Single-loss”          | 4332, 652 | 1882900 | < 2.2E-16 |
|                         | “Single-loss” – “Multiple-loss” | 652, 127  | 46673   | 1.15E-02  |
| <i>S. pneumoniae</i>    | “Core” – “Single-loss”          | 1202, 188 | 143410  | 1.39E-09  |
|                         | “Single-loss” – “Multiple-loss” | 188, 104  | 13243   | 2.60E-07  |
| <i>S. suis</i>          | “Core” – “Single-loss”          | 1056, 357 | 235350  | 1.03E-12  |
|                         | “Single-loss” – “Multiple-loss” | 357, 116  | 26656   | 1.62E-06  |
| <i>Y. pestis*</i>       | “Core” – “Single-loss”          | 2396, 507 | 762920  | < 2.2E-16 |
|                         | “Single-loss” – “Multiple-loss” | 507, 132  | 38926   | 1.91E-03  |

**Table S3.** Comparison of differences in the dN/dS values between the “core”, “single-loss” and “multiple-loss” pangene groups in the NCBI-annotated pangomes using one-sided Mann-Whitney-Wilcoxon test. Only genes with  $0.0001 < dN/dS \leq 2$  and tree length for dS  $\geq 0.001$  were analyzed (see Materials and Methods).

| <b>Organism</b>                | <b>Compared gene-loss groups</b> | <b>Number of pangenes in each group</b> | <b>U-test W</b> | <b>P-value</b> |
|--------------------------------|----------------------------------|-----------------------------------------|-----------------|----------------|
| <i>B. cereus</i>               | “Core” – “Single-loss”           | 3092, 504                               | 564172.5        | < 2.2E-16      |
|                                | “Single-loss” – “Multiple-loss”  | 504, 114                                | 25739           | 4.13E-02       |
| <i>C. botulinum</i>            | “Core” – “Single-loss”           | 2194, 473                               | 401535          | 5.58E-15       |
|                                | “Single-loss” – “Multiple-loss”  | 473, 107                                | 19247           | 5.44E-05       |
| <i>C. diphtheriae</i>          | “Core” – “Single-loss”           | 1543, 110                               | 71284           | 2.49E-03       |
|                                | “Single-loss” – “Multiple-loss”  | 110, 25                                 | 1097            | 5.80E-02       |
| <i>C. jejuni</i>               | “Core” – “Single-loss”           | 993, 299                                | 122564          | 2.36E-06       |
|                                | “Single-loss” – “Multiple-loss”  | 299, 34                                 | 3889            | 1.24E-02       |
| <i>C. pseudotuberculosis</i> * | “Core” – “Single-loss”           | 1298, 257                               | 150587          | 6.87E-03       |
|                                | “Single-loss” – “Multiple-loss”  | 257, 94                                 | 9834            | 3.84E-03       |
| <i>E. coli-Shigella</i>        | “Core” – “Single-loss”           | 1434, 628                               | 368533          | 2.52E-11       |
|                                | “Single-loss” – “Multiple-loss”  | 628, 969                                | 254441.5        | 1.56E-08       |
| <i>F. tularensis</i> *         | “Core” – “Single-loss”           | 754, 94                                 | 31158           | 2.80E-02       |
|                                | “Single-loss” – “Multiple-loss”  | 94, 40                                  | 1766            | 2.91E-01       |
| <i>H. influenzae</i>           | “Core” – “Single-loss”           | 996, 298                                | 142742.5        | 1.59E-01       |

|                         |                                    |           |          |           |
|-------------------------|------------------------------------|-----------|----------|-----------|
|                         | “Single-loss” –<br>“Multiple-loss” | 298, 51   | 5513     | 8.67E-04  |
| <i>L. monocytogenes</i> | “Core” – “Single-<br>loss”         | 2039, 284 | 213870   | 4.49E-13  |
|                         | “Single-loss” –<br>“Multiple-loss” | 284, 58   | 5119.5   | 2.80E-06  |
| <i>N. meningitidis</i>  | “Core” – “Single-<br>loss”         | 1197, 120 | 48728    | 3.06E-09  |
|                         | “Single-loss” –<br>“Multiple-loss” | 120, 55   | 2459     | 3.45E-03  |
| <i>P. aeruginosa</i>    | “Core” – “Single-<br>loss”         | 4071, 610 | 765266.5 | < 2.2E-16 |
|                         | “Single-loss” –<br>“Multiple-loss” | 610, 119  | 28895.5  | 2.15E-04  |
| <i>S. pneumoniae</i>    | “Core” – “Single-<br>loss”         | 1116, 176 | 84258    | 1.21E-03  |
|                         | “Single-loss” –<br>“Multiple-loss” | 176, 91   | 5926     | 2.50E-04  |
| <i>S. suis</i>          | “Core” – “Single-<br>loss”         | 1016, 344 | 149761   | 3.61E-05  |
|                         | “Single-loss” –<br>“Multiple-loss” | 344, 112  | 15082.5  | 2.79E-04  |

**Table S4.** Comparison of differences in the ENC' values between the “core”, “single-loss” and “multiple-loss” pangene groups in the NCBI-annotated pangomes using one-sided Mann-Whitney-Wilcoxon test. Only pangenes with all genes in the pangene group having length of at least 100 codons and relative standard deviation of ENC' values for individual genes  $\leq 10\%$  were analyzed (see Materials and Methods).

| <b>Organism</b>               | <b>Compared gene-loss groups</b> | <b>Number of pangenes in each group</b> | <b>U-test W</b> | <b>P-value</b> |
|-------------------------------|----------------------------------|-----------------------------------------|-----------------|----------------|
| <i>B. cereus</i>              | “Core” – “Single-loss”           | 2851, 429                               | 472920          | 1.73E-14       |
|                               | “Single-loss” – “Multiple-loss”  | 429, 74                                 | 14403           | 1.02E-01       |
| <i>C. botulinum</i>           | “Core” – “Single-loss”           | 2072, 431                               | 394500          | 6.93E-05       |
|                               | “Single-loss” – “Multiple-loss”  | 431, 91                                 | 18037           | 1.15E-01       |
| <i>C. diphtheriae</i>         | “Core” – “Single-loss”           | 1537, 107                               | 75518           | 7.88E-02       |
|                               | “Single-loss” – “Multiple-loss”  | 107, 21                                 | 648             | 1.12E-03       |
| <i>C. jejuni</i>              | “Core” – “Single-loss”           | 1007, 246                               | 116080          | 6.32E-02       |
|                               | “Single-loss” – “Multiple-loss”  | 246, 31                                 | 3298            | 1.11E-01       |
| <i>C. pseudotuberculosis*</i> | “Core” – “Single-loss”           | 1379, 268                               | 167880          | 8.81E-03       |
|                               | “Single-loss” – “Multiple-loss”  | 268, 81                                 | 9353            | 2.97E-02       |
| <i>E. coli-Shigella</i>       | “Core” – “Single-loss”           | 1420, 595                               | 355790          | 1.10E-08       |
|                               | “Single-loss” – “Multiple-loss”  | 595, 854                                | 226690          | 2.39E-04       |
| <i>F. tularensis*</i>         | “Core” – “Single-loss”           | 953, 112                                | 46461           | 1.25E-02       |
|                               | “Single-loss” – “Multiple-loss”  | 112, 41                                 | 1956            | 8.10E-02       |
| <i>H. influenzae</i>          | “Core” – “Single-                | 957, 286                                | 123400          | 5.79E-03       |

|                         |                                    |           |        |           |
|-------------------------|------------------------------------|-----------|--------|-----------|
|                         | loss”                              |           |        |           |
|                         | “Single-loss” –<br>“Multiple-loss” | 286, 48   | 4868   | 6.33E-04  |
| <i>L. monocytogenes</i> | “Core” – “Single-<br>loss”         | 2011, 279 | 225860 | 6.38E-08  |
|                         | “Single-loss” –<br>“Multiple-loss” | 279, 47   | 5438   | 3.07E-02  |
| <b>MTBC*</b>            | “Core” – “Single-<br>loss”         | 2657, 389 | 491420 | 5.87E-02  |
|                         | “Single-loss” –<br>“Multiple-loss” | 389, 158  | 18878  | 7.49E-13  |
| <i>N. meningitidis</i>  | “Core” – “Single-<br>loss”         | 1190, 114 | 49319  | 7.21E-07  |
|                         | “Single-loss” –<br>“Multiple-loss” | 114, 43   | 1971   | 2.96E-02  |
| <i>P. aeruginosa</i>    | “Core” – “Single-<br>loss”         | 4139, 550 | 795900 | < 2.2E-16 |
|                         | “Single-loss” –<br>“Multiple-loss” | 550, 94   | 21152  | 2.42E-03  |
| <i>S. pneumoniae</i>    | “Core” – “Single-<br>loss”         | 1113, 168 | 77073  | 1.20E-04  |
|                         | “Single-loss” –<br>“Multiple-loss” | 168, 73   | 4184   | 4.50E-05  |
| <i>S. suis</i>          | “Core” – “Single-<br>loss”         | 968, 328  | 131288 | 1.38E-06  |
|                         | “Single-loss” –<br>“Multiple-loss” | 328, 102  | 14333  | 1.45E-02  |
| <i>Y. pestis*</i>       | “Core” – “Single-<br>loss”         | 2390, 501 | 515670 | 5.11E-07  |
|                         | “Single-loss” –<br>“Multiple-loss” | 501, 124  | 25852  | 1.91E-03  |



**Table S5.** Results of correlation analysis between number of gene losses and dS along phylogenetic tree branches in the NCBI-annotated pangenomes. dS per branch was calculated as an average of dS values for individual “core” pangenomes on given branch.

| <b>Organism</b>                | <b>Spearman’s Rho</b> | <b>P-value</b> |
|--------------------------------|-----------------------|----------------|
| <i>B. cereus</i>               | 0.4979                | 0.0394         |
| <i>C. botulinum</i>            | 0.4615                | 0.1236         |
| <i>C. diphtheriae</i>          | 0.7263                | 0.0066         |
| <i>C. jejuni</i>               | 0.2914                | 0.2670         |
| <i>C. pseudotuberculosis</i> * | 0.6370                | 0.0052         |
| <i>E. coli-Shigella</i>        | 0.2769                | 0.0066         |
| <i>E. coli</i>                 | 0.2580                | 0.0188         |
| <i>Shigella spp.</i>           | 0.8374                | 0.0026         |
| <i>F. tularensis</i> *         | 0.6347                | 0.0434         |
| <i>H. influenzae</i>           | 0.1455                | 0.6456         |
| <i>L. monocytogenes</i>        | 0.4574                | 0.0094         |
| <i>N. meningitidis</i>         | 0.3099                | 0.1616         |
| <i>P. aeruginosa</i>           | 0.0857                | 0.7414         |
| <i>S. pneumoniae</i>           | 0.4284                | 0.0182         |
| <i>S. suis</i>                 | 0.5385                | 0.0160         |

**Table S6.** Differences in the amount of “core” (“unlost) and “near core” (“lost”) pangenes found in each COG category. Categories in which statistically significant difference between “lost” and “unlost” pangenes was found across all species are marked by (\*). (T) alongside *p-value* identifies that exact *p-value* for Mann-Whitney test couldn’t be calculated due to ties (identical values) in the original data. In particular, for A, B, W, Y and Z categories statistical analysis had little to none power since in most genomes no pangenes were found in these categories.

| COG category | Category description                                       | Number of species in which: |                   |                                   | P-value   |
|--------------|------------------------------------------------------------|-----------------------------|-------------------|-----------------------------------|-----------|
|              |                                                            | “Unlost” > “Lost”           | “Lost” > “Unlost” | No pangenes found in COG category |           |
| A*           | RNA processing and modification                            | 8                           | 2                 | 5                                 | 0.0272(T) |
| B            | Chromatin structure and dynamics                           | 3                           | 0                 | 12                                | 0.0797(T) |
| C            | Energy production and conversion                           | 9                           | 6                 | 0                                 | 0.3046    |
| D*           | Cell cycle control, cell division, chromosome partitioning | 15                          | 0                 | 0                                 | 0.0037(T) |
| E            | Amino acid transport and metabolism                        | 12                          | 3                 | 0                                 | 0.1873    |
| F*           | Nucleotide transport and metabolism                        | 14                          | 1                 | 0                                 | 0.0008    |
| G            | Carbohydrate transport and metabolism                      | 4                           | 11                | 0                                 | 0.2496    |
| H*           | Coenzyme transport and metabolism                          | 12                          | 3                 | 0                                 | 0.0023    |
| I            | Lipid transport and metabolism                             | 13                          | 2                 | 0                                 | 0.1261    |
| J*           | Translation, ribosomal structure and biogenesis            | 13                          | 2                 | 0                                 | 0.0235    |
| K            | Transcription                                              | 3                           | 12                | 0                                 | 0.1485    |
| L*           | Replication, recombination and repair                      | 13                          | 2                 | 0                                 | 0.0023    |

|    |                                                               |    |    |    |           |
|----|---------------------------------------------------------------|----|----|----|-----------|
| M  | Cell wall/membrane/envelope biogenesis                        | 9  | 6  | 0  | 0.6827    |
| N  | Cell motility                                                 | 4  | 11 | 0  | 0.6628(T) |
| O  | Posttranslational modification, protein turnover, chaperones  | 10 | 5  | 0  | 0.1873    |
| P  | Inorganic ion transport and metabolism                        | 5  | 10 | 0  | 0.3046    |
| Q  | Secondary metabolites biosynthesis, transport and catabolism  | 7  | 8  | 0  | 0.4124    |
| R  | General function prediction only                              | 6  | 9  | 0  | 0.2854    |
| S* | Function unknown                                              | 2  | 13 | 0  | 0.0164    |
| T  | Signal transduction mechanisms                                | 6  | 9  | 0  | 0.4363    |
| U  | Intracellular trafficking, secretion, and vesicular transport | 9  | 6  | 0  | 0.3835(T) |
| V* | Defense mechanisms                                            | 2  | 13 | 0  | 0.0023    |
| W  | Extracellular structures                                      | 1  | 2  | 12 | 0.6093(T) |
| X  | Mobilome: prophages, transposons                              | 5  | 7  | 3  | 0.9317(T) |
| Y  | Nuclear structure                                             | 0  | 0  | 15 | N/A       |
| Z  | Cytoskeleton                                                  | 3  | 0  | 12 | 0.0797(T) |

**Table S7.** Strains removed from further analysis.

| <i>Campylobacter jejuni</i>               |                                                                |
|-------------------------------------------|----------------------------------------------------------------|
| <b>Accession number</b>                   | <b>Strain Name</b>                                             |
| NC_002163                                 | Campylobacter jejuni subsp. jejuni NCTC 11168<br>= ATCC 700819 |
| NC_022351                                 | Campylobacter jejuni subsp. jejuni 00-2538                     |
| NC_022362                                 | Campylobacter jejuni subsp. jejuni 00-2425                     |
| NC_021834                                 | Campylobacter jejuni 32488                                     |
| <i>Clostridium botulinum</i>              |                                                                |
| <b>Accession number</b>                   | <b>Strain Name</b>                                             |
| NC_010674                                 | Clostridium botulinum B str. Eklund 17B                        |
| NC_010723                                 | Clostridium botulinum E3 str. Alaska E43                       |
| NC_015425                                 | Clostridium botulinum BKT015925                                |
| <i>Escherichia coli-Shigella Group</i>    |                                                                |
| <b>Accession number</b>                   | <b>Strain Name</b>                                             |
| NC_017644                                 | Escherichia coli NA114                                         |
| NC_017632                                 | Escherichia coli UM146                                         |
| NC_017634                                 | Escherichia coli O83:H1 str. NRG 857C                          |
| NC_022912                                 | Shigella dysenteriae 1617                                      |
| NC_020518                                 | Escherichia coli str. K-12 substr. MDS42                       |
| NC_010473                                 | Escherichia coli str. K-12 substr. DH10B                       |
| NC_017651                                 | Escherichia coli str. 'clone D i2'                             |
| <i>Listeria monocytogenes</i>             |                                                                |
| <b>Accession number</b>                   | <b>Strain Name</b>                                             |
| NC_017728                                 | Listeria monocytogenes 07PF0776                                |
| NC_020557                                 | Listeria monocytogenes La111                                   |
| NC_020558                                 | Listeria monocytogenes N53-1                                   |
| NC_021830                                 | Listeria monocytogenes J1-220                                  |
| <i>Mycobacterium Tuberculosis Cluster</i> |                                                                |
| <b>Accession number</b>                   | <b>Strain Name</b>                                             |
| NC_017026                                 | Mycobacterium tuberculosis RGTB327                             |
| NC_017528                                 | Mycobacterium tuberculosis RGTB423                             |

|                                      |                                                    |
|--------------------------------------|----------------------------------------------------|
| NC_021054                            | Mycobacterium tuberculosis str.<br>Beijing/NITR203 |
| NC_021192                            | Mycobacterium tuberculosis str.<br>Haarlem/NITR202 |
| NC_021193                            | Mycobacterium tuberculosis CAS/NITR204             |
| NC_021194                            | Mycobacterium tuberculosis EAI5/NITR206            |
| <b><i>Pseudomonas aeruginosa</i></b> |                                                    |
| <b>Accession number</b>              | <b>Strain Name</b>                                 |
| NC_022360                            | Pseudomonas aeruginosa c7447m                      |
| NC_022806                            | Pseudomonas aeruginosa PA1R                        |
| NC_022594                            | Pseudomonas aeruginosa PAO1-VE13                   |
| NC_022591                            | Pseudomonas aeruginosa PAO1-VE2                    |
| NC_022361                            | Pseudomonas aeruginosa PAO581                      |

**Table S8.** Number of “core”, “single-loss” and “multiple-loss” pangenes in the NCBI-annotation based pangenome that were tested in each analysis. Within each investigated species all strains were compared in the pairwise manner. For each strain pair percent of orthologous genes sharing at least 80% of protein sequence similarity was calculated (see Materials and Methods).

| Organism              | % of highly similar orthologous gene pairs | Loss category                     | Total number of pangenes | Evolutionary conservation analysis | dN/dS analysis | ENC' analysis |
|-----------------------|--------------------------------------------|-----------------------------------|--------------------------|------------------------------------|----------------|---------------|
| <i>B. cereus</i>      | 94.9% - 99.96%                             | "Core" pangenes                   | 3165                     | 3165                               | 3092           | 2851          |
|                       |                                            | "Single-loss" pangenes            | 512                      | 512                                | 504            | 429           |
|                       |                                            | "Multiple-loss" pangenes          | 118                      | 118                                | 114            | 74            |
|                       |                                            | <b>Total "near-core" pangenes</b> | <b>630</b>               | --                                 | --             | --            |
| <i>C. botulinum</i>   | 96.98% - 100%                              | "Core" pangenes                   | 2270                     | 2270                               | 2194           | 2072          |
|                       |                                            | "Single-loss" pangenes            | 479                      | 479                                | 473            | 431           |
|                       |                                            | "Multiple-loss" pangenes          | 112                      | 112                                | 107            | 91            |
|                       |                                            | <b>Total "near-core" pangenes</b> | <b>591</b>               | --                                 | --             | --            |
| <i>C. diphtheriae</i> | 98.19% - 99.95%                            | "Core" pangenes                   | 1630                     | 1630                               | 1543           | 1537          |
|                       |                                            | "Single-loss" pangenes            | 119                      | 119                                | 110            | 107           |
|                       |                                            | "Multiple-loss" pangenes          | 26                       | 26                                 | 25             | 21            |
|                       |                                            | <b>Total "near-core" pangenes</b> | <b>145</b>               | --                                 | --             | --            |
| <i>C. jejuni</i>      | 96.72% - 100%                              | "Core" pangenes                   | 1012                     | 1012                               | 993            | 1007          |
|                       |                                            | "Single-loss" pangenes            | 322                      | 322                                | 299            | 246           |
|                       |                                            | "Multiple-loss" pangenes          | 38                       | 38                                 | 34             | 31            |

|                              |                 |                                       |             |      |      |      |
|------------------------------|-----------------|---------------------------------------|-------------|------|------|------|
|                              |                 | loss"<br>pangenes                     |             |      |      |      |
|                              |                 | <b>Total "near-core"<br/>pangenes</b> | <b>360</b>  | --   | --   | --   |
| <i>C. pseudotuberculosis</i> | 99.30% - 100%   | "Core"<br>pangenes                    | 1471        | 1471 | 1298 | 1379 |
|                              |                 | "Single-loss"<br>pangenes             | 298         | 298  | 257  | 268  |
|                              |                 | "Multiple-loss"<br>pangenes           | 117         | 117  | 94   | 81   |
|                              |                 | <b>Total "near-core"<br/>pangenes</b> | <b>415</b>  | --   | --   | --   |
| <i>E. coli-Shigella</i>      | 96.80% - 100%   | "Core"<br>pangenes                    | 1456        | 1456 | 1434 | 1420 |
|                              |                 | "Single-loss"<br>pangenes             | 639         | 639  | 628  | 595  |
|                              |                 | "Multiple-loss"<br>pangenes           | 986         | 986  | 969  | 854  |
|                              |                 | <b>Total "near-core"<br/>pangenes</b> | <b>1625</b> | --   | --   | --   |
| <i>F. tularensis</i>         | 99.34% - 100%   | "Core"<br>pangenes                    | 1010        | 1010 | 754  | 953  |
|                              |                 | "Single-loss"<br>pangenes             | 130         | 130  | 94   | 112  |
|                              |                 | "Multiple-loss"<br>pangenes           | 56          | 56   | 40   | 41   |
|                              |                 | <b>Total "near-core"<br/>pangenes</b> | <b>186</b>  | --   | --   | --   |
| <i>H. influenzae</i>         | 97.51% - 99.57% | "Core"<br>pangenes                    | 1026        | 1026 | 996  | 957  |
|                              |                 | "Single-loss"<br>pangenes             | 300         | 300  | 298  | 286  |
|                              |                 | "Multiple-loss"<br>pangenes           | 54          | 54   | 51   | 48   |
|                              |                 | <b>Total "near-core"<br/>pangenes</b> | <b>354</b>  | --   | --   | --   |
| <i>L. monocytogenes</i>      | 97.19% - 100%   | "Core"<br>pangenes                    | 2174        | 2174 | 2039 | 2011 |
|                              |                 | "Single-loss"<br>pangenes             | 296         | 296  | 284  | 279  |

|                        |                 |                                     |            |      |      |      |
|------------------------|-----------------|-------------------------------------|------------|------|------|------|
|                        |                 | "Multiple-loss" pangenomes          | 61         | 61   | 58   | 47   |
|                        |                 | <b>Total "near-core" pangenomes</b> | <b>357</b> | --   | --   | --   |
| MTBC                   | 99.76% - 100%   | "Core" pangenomes                   | 2665       | 2665 | 648  | 2657 |
|                        |                 | "Single-loss" pangenomes            | 527        | 527  | 117  | 389  |
|                        |                 | "Multiple-loss" pangenomes          | 219        | 219  | 37   | 158  |
|                        |                 | <b>Total "near-core" pangenomes</b> | <b>746</b> | --   | --   | --   |
| <i>N. meningitidis</i> | 98.10% - 99.94% | "Core" pangenomes                   | 1270       | 1270 | 1197 | 1190 |
|                        |                 | "Single-loss" pangenomes            | 133        | 133  | 120  | 114  |
|                        |                 | "Multiple-loss" pangenomes          | 66         | 66   | 55   | 43   |
|                        |                 | <b>Total "near-core" pangenomes</b> | <b>199</b> | --   | --   | --   |
| <i>P. aeruginosa</i>   | 96.30% - 100%   | "Core" pangenomes                   | 4332       | 4332 | 4071 | 4139 |
|                        |                 | "Single-loss" pangenomes            | 652        | 652  | 610  | 550  |
|                        |                 | "Multiple-loss" pangenomes          | 127        | 127  | 119  | 94   |
|                        |                 | <b>Total "near-core" pangenomes</b> | <b>779</b> | --   | --   | --   |
| <i>S. pneumoniae</i>   | 97.49% - 100%   | "Core" pangenomes                   | 1202       | 1202 | 1116 | 1113 |
|                        |                 | "Single-loss" pangenomes            | 188        | 188  | 176  | 168  |
|                        |                 | "Multiple-loss" pangenomes          | 104        | 104  | 91   | 73   |
|                        |                 | <b>Total "near-core" pangenomes</b> | <b>292</b> | --   | --   | --   |
| <i>S. suis</i>         | 95.34% - 100%   | "Core" pangenomes                   | 1056       | 1056 | 1016 | 968  |
|                        |                 | "Single-loss" pangenomes            | 357        | 357  | 344  | 328  |



|                  |                 |                                   |            |      |     |      |
|------------------|-----------------|-----------------------------------|------------|------|-----|------|
|                  |                 | pangenes                          |            |      |     |      |
|                  |                 | "Multiple-loss" pangenes          | 116        | 116  | 112 | 102  |
|                  |                 | <b>Total "near-core" pangenes</b> | <b>473</b> | --   | --  | --   |
| <i>Y. pestis</i> | 99.90% - 99.87% | "Core" pangenes                   | 2396       | 2396 | 221 | 2390 |
|                  |                 | "Single-loss" pangenes            | 507        | 507  | 68  | 501  |
|                  |                 | "Multiple-loss" pangenes          | 132        | 132  | 9   | 124  |
|                  |                 | <b>Total "near-core" pangenes</b> | <b>639</b> | --   |     | --   |
